# Supplementary material
Source: publisher figshare collection journal article supplement (https://frontiersin.figshare.com/ndownloader/files/29079054)
Supplement: Supplementary file 1 [file 29079054]

## Sheet: Info
Simulation date : 2021 / 04 / 07
Software : Photosim M - revision 20.1.2
Configuration (PBR5L)
	-------------------------------------------------------------------------
	Reactor and model main parameters
	-------------------------------------------------------------------------
	[P1] Reactor Design (1=flat single side ; 2=flat 2 side : 3
	[P2] Reactor type (1=vessel ; 2 gazosyphon) : 1
	[P3] Reactor height (only Gazosyphon) : 2.600000e+00
	[P4] Reactor Charateristic Dimension (m) : 0.075
	[P5] Reactor dark fraction of liquid volume [0-1] : 0.000
	[P6] Reactor Light Incident Flux (W/m2) : 100
	[P7] Stoichiometric model (1=LP correlation) ; 2=TLPI m : 2
	[P8] Carbon source ( 1=TIC ; 2=HCO3- ; 3= CO2liq and HC : 2
	[P9] Nitrogen source ( 1=N-NO3 ; 2=N-NH3) : 1 OR 2
	[P10] pH limiting term (1=no ; 2=pandey et al. 2010 corr : 1
	[P11] Temperature limiting term (1=no ; 2=cornet et al. : 1

## Sheet: RO2_NO3 vs NH4
Diffrence at Light Flux (qo) 146W/m2
Biomass (g/L)	Delta RO2 (RO2 for NO3-RO2 for NH4)
0.01	0.0147431
0.030101	0.0260245
0.050202	0.0361176
0.070303	0.0452627
0.090404	0.0536242
0.110505	0.0613241
0.130606	0.0684564
0.150707	0.0750959
0.170808	0.0813035
0.190909	0.087129
0.21101	0.0926144
0.231111	0.0977949
0.251212	0.102701
0.271313	0.107358
0.291414	0.111789
0.311515	0.116013
0.331616	0.120048
0.351717	0.123909
0.371818	0.127608
0.391919	0.131159
0.41202	0.134573
0.432121	0.137857
0.452222	0.141022
0.472323	0.144075
0.492424	0.147024
0.512525	0.149874
0.532626	0.152632
0.552727	0.155303
0.572828	0.157892
0.592929	0.160403
0.61303	0.162841
0.633131	0.16521
0.653232	0.167513
0.673333	0.169754
0.693434	0.171936
0.713535	0.17406
0.733636	0.176131
0.753737	0.178151
0.773838	0.180122
0.793939	0.182045
0.81404	0.183924
0.834141	0.18576
0.854242	0.187555
0.874343	0.18931
0.894444	0.191028
0.914546	0.192709
0.934647	0.194355
0.954747	0.195968
0.974849	0.197548
0.99495	0.199097
1.01505	0.200616
1.03515	0.202106
1.05525	0.203568
1.07535	0.205004
1.09546	0.206413
1.11556	0.207796
1.13566	0.209156
1.15576	0.210492
1.17586	0.211805
1.19596	0.213096
1.21606	0.214366
1.23616	0.215614
1.25626	0.216843
1.27636	0.218052
1.29646	0.219242
1.31657	0.220414
1.33667	0.221568
1.35677	0.222704
1.37687	0.223824
1.39697	0.224927
1.41707	0.226015
1.43717	0.227086
1.45727	0.228143
1.47737	0.229183
1.49747	0.230211
1.51758	0.231225
1.53768	0.232224
1.55778	0.23321
1.57788	0.234184
1.59798	0.235144
1.61808	0.236093
1.63818	0.23703
1.65828	0.237954
1.67838	0.238867
1.69849	0.239769
1.71859	0.24066
1.73869	0.24154
1.75879	0.24241
1.77889	0.243269
1.79899	0.244118
1.81909	0.244957
1.83919	0.245788
1.85929	0.246609
1.87939	0.24742
1.89949	0.248222
1.9196	0.249015
1.9397	0.2498
1.9598	0.250576
1.9799	0.251345
2	0.252104

## Sheet: RO2_NO3
OXYGEN PRODUCTION RATE (mmolO2.L.h-1) FUNCTION OF LIGHT FLUX Q0(W/m2) AND BIOMASS (g/L) - HNO3
q0(W/m2)/X(g/L)	2	3.49495	4.9899	6.48485	7.9798	9.47475	10.9697	12.4647	13.9596	15.4545	16.9495	18.4444	19.9394	21.4343	22.9293	24.4242	25.9192	27.4141	28.9091	30.404	31.899	33.3939	34.8889	36.3838	37.8788	39.3737	40.8687	42.3636	43.8586	45.3535	46.8485	48.3434	49.8384	51.3333	52.8283	54.3232	55.8182	57.3131	58.8081	60.303	61.798	63.2929	64.7879	66.2828	67.7778	69.2727	70.7677	72.2626	73.7576
0.01	0.0127578	0.0320414	0.0446469	0.0527191	0.0579152	0.0613438	0.063691	0.0635396	0.0627712	0.0623123	0.0620194	0.0618196	0.0616748	0.0615645	0.061477	0.0614055	0.0613456	0.0612946	0.0612504	0.0612118	0.0611777	0.0611473	0.06112	0.0610953	0.061073	0.0610526	0.0610339	0.0610167	0.0610008	0.0609861	0.0609724	0.0609597	0.0609479	0.0609367	0.0609263	0.0609165	0.0609073	0.0608986	0.0608903	0.0608825	0.0608752	0.0608681	0.0608615	0.0608551	0.0608491	0.0608433	0.0608378	0.0608325	0.0608275
0.030101	0.0191436	0.0491541	0.0697686	0.0835818	0.0928218	0.0991072	0.103511	0.106708	0.108073	0.107768	0.107674	0.107677	0.107721	0.10778	0.107843	0.107904	0.107961	0.108013	0.108062	0.108106	0.108146	0.108183	0.108216	0.108247	0.108275	0.108302	0.108326	0.108349	0.10837	0.108389	0.108408	0.108425	0.108441	0.108456	0.10847	0.108483	0.108496	0.108508	0.108519	0.10853	0.10854	0.10855	0.108559	0.108568	0.108577	0.108585	0.108592	0.1086	0.108607
0.050202	0.0240041	0.0626949	0.0903078	0.109475	0.122685	0.131881	0.138436	0.143254	0.146916	0.148246	0.148454	0.148747	0.149054	0.149346	0.149613	0.149852	0.150067	0.150258	0.150429	0.150582	0.150721	0.150846	0.15096	0.151065	0.15116	0.151248	0.151329	0.151403	0.151473	0.151537	0.151597	0.151653	0.151706	0.151755	0.151802	0.151846	0.151887	0.151926	0.151963	0.151998	0.152031	0.152063	0.152093	0.152121	0.152148	0.152175	0.152199	0.152223	0.152246
0.070303	0.0278366	0.0737069	0.107468	0.131588	0.148621	0.160709	0.169444	0.175927	0.180889	0.1848	0.1854	0.186033	0.186647	0.187209	0.187712	0.188158	0.188552	0.188902	0.189214	0.189493	0.189744	0.18997	0.190176	0.190364	0.190535	0.190693	0.190838	0.190972	0.191096	0.191212	0.191319	0.19142	0.191514	0.191602	0.191685	0.191763	0.191837	0.191906	0.191972	0.192035	0.192094	0.19215	0.192204	0.192255	0.192304	0.19235	0.192394	0.192437	0.192478
0.090404	0.0309387	0.0828489	0.122041	0.150727	0.17141	0.186327	0.197235	0.205397	0.211678	0.216649	0.219175	0.220182	0.221131	0.221988	0.222748	0.223417	0.224008	0.22453	0.224994	0.225409	0.225782	0.226118	0.226422	0.2267	0.226954	0.227186	0.227401	0.227599	0.227782	0.227953	0.228111	0.22826	0.228399	0.228529	0.228651	0.228766	0.228875	0.228977	0.229074	0.229166	0.229253	0.229336	0.229415	0.22949	0.229562	0.22963	0.229696	0.229758	0.229818
0.110505	0.0335018	0.0905641	0.134581	0.167473	0.191619	0.209284	0.222334	0.232169	0.239773	0.245812	0.250262	0.251665	0.25297	0.254138	0.255169	0.256075	0.256873	0.257577	0.258202	0.258759	0.25926	0.259711	0.26012	0.260492	0.260832	0.261143	0.261431	0.261696	0.261941	0.262169	0.262382	0.26258	0.262766	0.26294	0.263103	0.263257	0.263402	0.263539	0.263669	0.263792	0.263908	0.264019	0.264125	0.264225	0.264321	0.264412	0.264499	0.264583	0.264663
0.130606	0.0356556	0.0971642	0.145492	0.18226	0.209683	0.229999	0.245148	0.256637	0.265558	0.272662	0.27846	0.280848	0.282521	0.284013	0.285326	0.286478	0.287489	0.288382	0.289173	0.289879	0.290512	0.291082	0.291598	0.292068	0.292497	0.292891	0.293253	0.293587	0.293897	0.294185	0.294452	0.294702	0.294936	0.295156	0.295361	0.295555	0.295738	0.295911	0.296074	0.296229	0.296376	0.296515	0.296648	0.296774	0.296895	0.29701	0.29712	0.297225	0.297326
0.150707	0.0374908	0.102875	0.155074	0.195419	0.225937	0.248806	0.266001	0.279117	0.28934	0.297503	0.304177	0.308022	0.310072	0.311896	0.313498	0.314902	0.316134	0.317219	0.318181	0.319039	0.319807	0.320499	0.321125	0.321695	0.322215	0.322692	0.323131	0.323536	0.323912	0.32426	0.324584	0.324887	0.32517	0.325436	0.325685	0.32592	0.326141	0.32635	0.326548	0.326735	0.326913	0.327082	0.327242	0.327395	0.327541	0.32768	0.327813	0.327941	0.328062
0.170808	0.0390732	0.107866	0.163556	0.207209	0.240649	0.265968	0.285154	0.299866	0.311372	0.320582	0.328123	0.333426	0.335859	0.33802	0.339917	0.341577	0.343033	0.344315	0.34545	0.346461	0.347367	0.348183	0.348921	0.349592	0.350205	0.350767	0.351284	0.35176	0.352202	0.352612	0.352994	0.35335	0.353683	0.353996	0.354289	0.354565	0.354825	0.355071	0.355304	0.355524	0.355733	0.355932	0.356121	0.3563	0.356472	0.356635	0.356792	0.356941	0.357085
0.190909	0.0404516	0.112264	0.17112	0.217835	0.254034	0.281704	0.30282	0.319093	0.331862	0.342103	0.350501	0.357258	0.360078	0.36258	0.364774	0.366694	0.368376	0.369856	0.371167	0.372333	0.373378	0.374319	0.37517	0.375943	0.37665	0.377297	0.377892	0.378441	0.37895	0.379422	0.379862	0.380272	0.380656	0.381015	0.381353	0.381671	0.38197	0.382253	0.382521	0.382775	0.383015	0.383244	0.383461	0.383668	0.383865	0.384053	0.384234	0.384406	0.38457
0.21101	0.041663	0.11617	0.177907	0.227463	0.266269	0.296191	0.319178	0.336976	0.350983	0.362239	0.371481	0.379225	0.382893	0.385738	0.388232	0.390412	0.392322	0.394002	0.395489	0.396812	0.397997	0.399063	0.400028	0.400904	0.401705	0.402438	0.403112	0.403734	0.40431	0.404845	0.405342	0.405807	0.406241	0.406648	0.40703	0.40739	0.407729	0.408049	0.408352	0.408639	0.408911	0.40917	0.409416	0.40965	0.409873	0.410086	0.41029	0.410485	0.410671
0.231111	0.042736	0.119661	0.18403	0.23623	0.277497	0.309578	0.334378	0.353662	0.368882	0.381135	0.391209	0.399657	0.404444	0.407633	0.410427	0.412869	0.415008	0.416889	0.418553	0.420033	0.421358	0.42255	0.423629	0.424608	0.425503	0.426322	0.427075	0.42777	0.428414	0.429011	0.429567	0.430085	0.43057	0.431025	0.431451	0.431853	0.432232	0.43259	0.432928	0.433248	0.433552	0.433841	0.434115	0.434376	0.434626	0.434864	0.435091	0.435308	0.435516
0.251212	0.043693	0.1228	0.189584	0.244246	0.287842	0.321991	0.348544	0.369277	0.385685	0.398917	0.409809	0.41895	0.424853	0.428385	0.43148	0.434184	0.436551	0.438633	0.440474	0.442112	0.443577	0.444895	0.446087	0.44717	0.448158	0.449064	0.449896	0.450664	0.451375	0.452034	0.452648	0.453221	0.453757	0.454259	0.45473	0.455174	0.455592	0.455987	0.45636	0.456714	0.457049	0.457368	0.457671	0.45796	0.458235	0.458498	0.458749	0.458989	0.459218
0.271313	0.0445518	0.125638	0.194643	0.251604	0.297406	0.333535	0.361785	0.383929	0.4015	0.415692	0.427387	0.437209	0.444222	0.448097	0.451492	0.454458	0.457054	0.459336	0.461354	0.463149	0.464754	0.466198	0.467504	0.468689	0.469772	0.470763	0.471674	0.472515	0.473293	0.474015	0.474686	0.475313	0.475899	0.476449	0.476965	0.47745	0.477908	0.47834	0.478748	0.479135	0.479502	0.479851	0.480183	0.480498	0.4808	0.481087	0.481361	0.481624	0.481875
0.291414	0.0453267	0.128216	0.199271	0.258383	0.306274	0.344303	0.374193	0.397712	0.416419	0.431553	0.444037	0.454529	0.462645	0.466859	0.470553	0.47378	0.476605	0.479087	0.481281	0.483233	0.484978	0.486547	0.487965	0.489254	0.49043	0.491506	0.492496	0.493409	0.494254	0.495038	0.495768	0.496449	0.497085	0.497681	0.498242	0.498769	0.499265	0.499735	0.500178	0.500598	0.500997	0.501375	0.501735	0.502078	0.502405	0.502717	0.503015	0.5033	0.503573
0.311515	0.0460295	0.130569	0.203522	0.264649	0.314522	0.354372	0.385849	0.410706	0.430524	0.446582	0.459839	0.470989	0.480199	0.484752	0.488743	0.49223	0.495282	0.497964	0.500334	0.50244	0.504324	0.506019	0.50755	0.508941	0.510209	0.511371	0.512439	0.513424	0.514335	0.515181	0.515969	0.516703	0.517389	0.518033	0.518637	0.519205	0.519741	0.520247	0.520725	0.521179	0.521608	0.522017	0.522405	0.522774	0.523127	0.523463	0.523784	0.524092	0.524386
0.331616	0.0466697	0.132723	0.207438	0.270458	0.322213	0.363809	0.396823	0.422982	0.443886	0.460848	0.474865	0.486662	0.496754	0.501845	0.506131	0.509877	0.513154	0.516034	0.518579	0.520841	0.522864	0.524682	0.526325	0.527817	0.529178	0.530425	0.53157	0.532627	0.533605	0.534512	0.535356	0.536144	0.53688	0.53757	0.538218	0.538828	0.539402	0.539945	0.540458	0.540944	0.541404	0.541842	0.542258	0.542655	0.543033	0.543393	0.543738	0.544067	0.544383
0.351717	0.0472554	0.134705	0.211059	0.275858	0.329402	0.372676	0.407175	0.434602	0.456568	0.474417	0.489179	0.50161	0.512251	0.518199	0.522779	0.526781	0.530283	0.533361	0.536079	0.538495	0.540655	0.542597	0.544351	0.545945	0.547397	0.548728	0.549951	0.551079	0.552122	0.553091	0.553991	0.554832	0.555618	0.556354	0.557045	0.557696	0.558309	0.558888	0.559435	0.559953	0.560445	0.560912	0.561356	0.561779	0.562182	0.562567	0.562934	0.563286	0.563622
0.371818	0.0477931	0.136532	0.214417	0.280892	0.336138	0.381022	0.41696	0.445621	0.468625	0.487343	0.502836	0.51589	0.527069	0.533869	0.538741	0.542999	0.546724	0.549997	0.552888	0.555458	0.557754	0.559818	0.561683	0.563376	0.564921	0.566335	0.567634	0.568833	0.569942	0.57097	0.571928	0.57282	0.573655	0.574438	0.575172	0.575863	0.576514	0.577129	0.577711	0.578261	0.578783	0.579279	0.579751	0.5802	0.580628	0.581037	0.581427	0.581801	0.582158
0.391919	0.0482886	0.138223	0.217538	0.285596	0.342462	0.388894	0.426224	0.456088	0.480107	0.499675	0.515887	0.529552	0.54126	0.548906	0.554068	0.558578	0.562525	0.565992	0.569055	0.571776	0.574208	0.576394	0.578369	0.580162	0.581797	0.583293	0.584669	0.585938	0.587111	0.5882	0.589213	0.590158	0.591041	0.591869	0.592646	0.593378	0.594067	0.594717	0.595333	0.595915	0.596468	0.596993	0.597492	0.597967	0.59842	0.598852	0.599266	0.599661	0.600039
0.41202	0.0487466	0.139793	0.220447	0.290001	0.348412	0.396332	0.435011	0.466046	0.491056	0.511459	0.528375	0.542642	0.554868	0.563354	0.568802	0.573564	0.57773	0.581391	0.584624	0.587496	0.590062	0.592369	0.594453	0.596344	0.598069	0.599647	0.601099	0.602437	0.603674	0.604823	0.605891	0.606888	0.60782	0.608693	0.609512	0.610283	0.61101	0.611696	0.612345	0.612959	0.613542	0.614095	0.614622	0.615123	0.6156	0.616056	0.616492	0.616908	0.617307
0.432121	0.0491713	0.141254	0.223166	0.294134	0.354021	0.403371	0.443357	0.475533	0.501513	0.522733	0.540341	0.555198	0.567935	0.577254	0.582985	0.587995	0.59238	0.596232	0.599634	0.602655	0.605355	0.607781	0.609973	0.611962	0.613776	0.615437	0.616962	0.618369	0.619671	0.620878	0.622002	0.62305	0.624029	0.624947	0.625808	0.626619	0.627383	0.628104	0.628786	0.629432	0.630045	0.630626	0.63118	0.631706	0.632208	0.632687	0.633145	0.633583	0.634002
0.452222	0.0495661	0.142616	0.225712	0.298021	0.359316	0.410045	0.451297	0.484584	0.511513	0.533535	0.55182	0.567258	0.580496	0.59064	0.596651	0.601909	0.60651	0.610551	0.61412	0.617291	0.620123	0.622668	0.624967	0.627053	0.628955	0.630696	0.632296	0.633772	0.635136	0.636402	0.63758	0.638678	0.639705	0.640667	0.641571	0.642421	0.643221	0.643977	0.644692	0.645369	0.646011	0.646621	0.647201	0.647753	0.64828	0.648782	0.649262	0.649721	0.65016
0.472323	0.049934	0.14389	0.228101	0.301682	0.364324	0.41638	0.458861	0.493231	0.521088	0.543895	0.562847	0.578854	0.592585	0.603545	0.609835	0.615337	0.620152	0.624382	0.628117	0.631435	0.634398	0.637061	0.639466	0.641648	0.643638	0.645459	0.647132	0.648675	0.650103	0.651427	0.652658	0.653807	0.654881	0.655887	0.656832	0.65772	0.658558	0.659348	0.660096	0.660804	0.661475	0.662113	0.662719	0.663296	0.663847	0.664372	0.664874	0.665353	0.665813
0.492424	0.0502778	0.145084	0.230347	0.305137	0.369069	0.422403	0.466075	0.501501	0.530266	0.553844	0.57345	0.590016	0.604232	0.615999	0.622565	0.628309	0.633337	0.637754	0.641653	0.645117	0.648211	0.65099	0.6535	0.655778	0.657854	0.659755	0.661501	0.663111	0.6646	0.665982	0.667267	0.668465	0.669586	0.670635	0.671621	0.672548	0.673422	0.674246	0.675026	0.675765	0.676465	0.67713	0.677763	0.678365	0.678939	0.679487	0.68001	0.680511	0.68099
0.512525	0.0505996	0.146204	0.232462	0.308403	0.373569	0.428137	0.472965	0.509421	0.539074	0.563407	0.583656	0.600773	0.615465	0.628023	0.634869	0.640853	0.646092	0.650694	0.654756	0.658364	0.661587	0.664482	0.667096	0.669468	0.671631	0.67361	0.675428	0.677105	0.678655	0.680094	0.681432	0.68268	0.683846	0.684939	0.685965	0.68693	0.68784	0.688699	0.68951	0.690279	0.691008	0.691701	0.692359	0.692986	0.693584	0.694154	0.694699	0.69522	0.695719
0.532626	0.0509016	0.147259	0.234459	0.311494	0.377844	0.433602	0.479552	0.517012	0.547536	0.57261	0.593489	0.611147	0.626308	0.639502	0.646771	0.652994	0.658441	0.663226	0.667451	0.671202	0.674552	0.677562	0.68028	0.682745	0.684993	0.68705	0.68894	0.690682	0.692294	0.693789	0.695179	0.696476	0.697688	0.698824	0.69989	0.700893	0.701838	0.70273	0.703573	0.704372	0.70513	0.705849	0.706534	0.707185	0.707806	0.708398	0.708964	0.709506	0.710024
0.552727	0.0511856	0.148253	0.236345	0.314425	0.38191	0.438818	0.485857	0.524297	0.555672	0.581474	0.602973	0.621163	0.636784	0.650383	0.658295	0.664754	0.670408	0.675374	0.679759	0.683653	0.68713	0.690253	0.693073	0.695631	0.697963	0.700098	0.702058	0.703866	0.705538	0.707088	0.708531	0.709876	0.711133	0.712311	0.713417	0.714457	0.715438	0.716363	0.717238	0.718067	0.718853	0.719599	0.720308	0.720984	0.721628	0.722243	0.72283	0.723391	0.723928
0.572828	0.051453	0.149191	0.238131	0.317208	0.385783	0.443801	0.491898	0.531295	0.563504	0.590019	0.612128	0.63084	0.646915	0.660911	0.669466	0.676154	0.682013	0.68716	0.691703	0.695737	0.69934	0.702576	0.705497	0.708147	0.710563	0.712774	0.714804	0.716677	0.718408	0.720014	0.721508	0.722901	0.724203	0.725423	0.726569	0.727646	0.728661	0.729619	0.730526	0.731383	0.732197	0.73297	0.733705	0.734404	0.735071	0.735708	0.736316	0.736897	0.737453
0.592929	0.0517053	0.150078	0.239824	0.319854	0.389476	0.448566	0.497692	0.538023	0.571048	0.598265	0.620972	0.640199	0.65672	0.671107	0.680295	0.687214	0.693276	0.698601	0.703302	0.707476	0.711203	0.71455	0.717571	0.720313	0.722811	0.725098	0.727198	0.729134	0.730925	0.732586	0.734131	0.735571	0.736918	0.738179	0.739363	0.740478	0.741527	0.742518	0.743455	0.744342	0.745183	0.745982	0.746742	0.747466	0.748155	0.748813	0.749442	0.750043	0.750618
0.61303	0.0519438	0.150918	0.241432	0.322371	0.393001	0.453129	0.503255	0.544497	0.578323	0.606227	0.629523	0.649256	0.666216	0.680988	0.690804	0.697951	0.704214	0.709716	0.714573	0.718885	0.722735	0.726193	0.729314	0.732146	0.734726	0.737088	0.739257	0.741256	0.743106	0.744821	0.746416	0.747904	0.749294	0.750597	0.75182	0.75297	0.754054	0.755077	0.756045	0.756961	0.757829	0.758654	0.759439	0.760186	0.760898	0.761577	0.762226	0.762847	0.763441
0.633131	0.0521695	0.151715	0.242959	0.324771	0.39637	0.457501	0.508599	0.550733	0.585343	0.613923	0.637797	0.658028	0.67542	0.690572	0.70101	0.708383	0.714845	0.720522	0.725533	0.729982	0.733955	0.737522	0.740742	0.743663	0.746324	0.74876	0.750997	0.75306	0.754967	0.756736	0.758381	0.759916	0.76135	0.762693	0.763954	0.765141	0.766258	0.767313	0.768311	0.769256	0.770152	0.771002	0.771811	0.772582	0.773316	0.774016	0.774685	0.775325	0.775938
0.653232	0.0523834	0.152472	0.244413	0.32706	0.399592	0.461695	0.51374	0.556743	0.592122	0.621365	0.645809	0.66653	0.684348	0.699873	0.710927	0.718523	0.725183	0.731034	0.736198	0.740783	0.744876	0.748552	0.751869	0.754879	0.757621	0.760131	0.762436	0.76456	0.766525	0.768347	0.770042	0.771622	0.7731	0.774483	0.775782	0.777004	0.778155	0.779242	0.78027	0.781243	0.782166	0.783042	0.783875	0.784668	0.785424	0.786146	0.786835	0.787494	0.788125
0.673333	0.0525865	0.153191	0.245798	0.329247	0.402678	0.465722	0.518687	0.562542	0.598673	0.628569	0.653573	0.674776	0.693013	0.708906	0.72057	0.728388	0.735243	0.741265	0.746582	0.751301	0.755514	0.759297	0.762712	0.765809	0.768631	0.771213	0.773585	0.775771	0.777793	0.779668	0.781412	0.783038	0.784558	0.785982	0.787318	0.788575	0.78976	0.790878	0.791935	0.792937	0.793886	0.794787	0.795644	0.796461	0.797239	0.797981	0.79869	0.799368	0.800017
0.693434	0.0527796	0.153876	0.24712	0.331337	0.405635	0.469591	0.523453	0.568138	0.605009	0.635546	0.6611	0.682778	0.701429	0.717684	0.729952	0.737989	0.745038	0.751231	0.756697	0.76155	0.765882	0.769771	0.773282	0.776466	0.779367	0.782022	0.78446	0.786707	0.788785	0.790713	0.792505	0.794177	0.795739	0.797202	0.798576	0.799868	0.801085	0.802235	0.803321	0.80435	0.805326	0.806252	0.807133	0.807972	0.808772	0.809535	0.810263	0.81096	0.811627
0.713535	0.0529633	0.154529	0.248382	0.333338	0.408472	0.473312	0.528046	0.573546	0.611141	0.642307	0.668404	0.69055	0.709607	0.726219	0.739086	0.747345	0.75458	0.760942	0.766558	0.771542	0.775992	0.779987	0.783593	0.786863	0.789842	0.792569	0.795072	0.79738	0.799514	0.801493	0.803334	0.80505	0.806654	0.808157	0.809567	0.810894	0.812144	0.813324	0.81444	0.815496	0.816498	0.817449	0.818354	0.819215	0.820036	0.820819	0.821568	0.822283	0.822968
0.733636	0.0531383	0.155152	0.249588	0.335254	0.411196	0.476893	0.532478	0.578772	0.617079	0.648864	0.675495	0.698101	0.717559	0.734523	0.747982	0.756457	0.763881	0.77041	0.776174	0.781289	0.785856	0.789956	0.793655	0.797011	0.800068	0.802865	0.805434	0.807802	0.809991	0.812021	0.81391	0.81567	0.817316	0.818858	0.820305	0.821666	0.822948	0.824159	0.825303	0.826387	0.827414	0.82839	0.829318	0.830201	0.831044	0.831847	0.832615	0.833349	0.834051
0.753737	0.0533052	0.155747	0.250743	0.337091	0.413813	0.480342	0.536756	0.583828	0.622833	0.655227	0.682383	0.705443	0.725296	0.742607	0.756651	0.765341	0.772952	0.779647	0.785557	0.790802	0.795485	0.799688	0.803481	0.806921	0.810055	0.812922	0.815556	0.817983	0.820227	0.822308	0.824244	0.826049	0.827735	0.829315	0.830799	0.832194	0.833508	0.834749	0.835922	0.837032	0.838086	0.839086	0.840037	0.840942	0.841805	0.842629	0.843415	0.844168	0.844888
0.773838	0.0534647	0.156316	0.251848	0.338855	0.41633	0.483667	0.540889	0.588722	0.628412	0.661405	0.689078	0.712585	0.732827	0.750481	0.765103	0.774006	0.781803	0.788662	0.794717	0.800091	0.804888	0.809194	0.813079	0.816603	0.819814	0.822751	0.825448	0.827934	0.830233	0.832364	0.834346	0.836195	0.837922	0.839541	0.841059	0.842488	0.843834	0.845105	0.846306	0.847444	0.848522	0.849546	0.85052	0.851448	0.852331	0.853175	0.85398	0.854751	0.855488
0.793939	0.0536171	0.156861	0.252908	0.340548	0.418753	0.486873	0.544883	0.593462	0.633824	0.667406	0.695588	0.719536	0.740162	0.758154	0.773345	0.782463	0.790449	0.797465	0.803664	0.809165	0.814076	0.818483	0.822461	0.826068	0.829354	0.83236	0.83512	0.837665	0.840017	0.842198	0.844227	0.846119	0.847887	0.849543	0.851097	0.852559	0.853936	0.855237	0.856466	0.85763	0.858734	0.859782	0.860779	0.861727	0.862632	0.863498	0.864322	0.865111	0.865865
0.81404	0.0537629	0.157383	0.253926	0.342176	0.421086	0.489968	0.548747	0.598055	0.639077	0.673238	0.701923	0.726305	0.74731	0.765634	0.781382	0.790719	0.798888	0.806065	0.812406	0.818034	0.823057	0.827565	0.831634	0.835323	0.838684	0.841758	0.844581	0.847183	0.849589	0.85182	0.853895	0.855829	0.857637	0.859331	0.86092	0.862415	0.863824	0.865154	0.866411	0.867604	0.868733	0.869805	0.870824	0.871794	0.872719	0.873602	0.874444	0.875251	0.876022
0.834141	0.0539026	0.157884	0.254902	0.343742	0.423335	0.492957	0.552485	0.602509	0.644179	0.678911	0.708089	0.7329	0.754278	0.772931	0.789251	0.798784	0.807134	0.814469	0.820952	0.826705	0.83184	0.836448	0.840607	0.844378	0.847812	0.850955	0.85384	0.8565	0.858958	0.861238	0.863359	0.865335	0.867183	0.868914	0.870542	0.87207	0.873509	0.874868	0.876153	0.877369	0.878522	0.879618	0.880659	0.88165	0.882595	0.883497	0.884359	0.885182	0.885971
0.854242	0.0540365	0.158364	0.255841	0.345249	0.425503	0.495845	0.556106	0.606829	0.649136	0.684429	0.714095	0.739328	0.761074	0.780051	0.796794	0.806665	0.815195	0.822694	0.82931	0.835187	0.840433	0.84514	0.849388	0.853239	0.856748	0.859957	0.862905	0.865621	0.868132	0.87046	0.87263	0.874649	0.876536	0.878304	0.879962	0.881523	0.882993	0.88438	0.885692	0.886934	0.888112	0.889231	0.890294	0.891307	0.892272	0.893192	0.894072	0.894913	0.895718
0.874343	0.054165	0.158825	0.256744	0.346701	0.427596	0.498638	0.559613	0.611023	0.653956	0.689801	0.719947	0.745596	0.767706	0.787003	0.804029	0.814369	0.823077	0.830733	0.837494	0.843487	0.848842	0.853648	0.857984	0.861916	0.865498	0.868774	0.871788	0.87456	0.877123	0.879499	0.88171	0.88377	0.885696	0.8875	0.889193	0.890785	0.892286	0.893702	0.895041	0.896308	0.897511	0.898652	0.899737	0.900771	0.901756	0.902695	0.903593	0.904452	0.905273
0.894444	0.0542883	0.159269	0.257613	0.348101	0.429617	0.50134	0.563014	0.615095	0.658643	0.695032	0.725651	0.751712	0.77418	0.793792	0.811099	0.821904	0.830788	0.8386	0.845498	0.85162	0.857083	0.861986	0.86641	0.870421	0.874075	0.877417	0.880486	0.883314	0.885928	0.888353	0.890607	0.892709	0.894674	0.896514	0.898241	0.899865	0.901395	0.90284	0.904205	0.905498	0.906725	0.907889	0.908996	0.91005	0.911055	0.912013	0.912929	0.913804	0.914643
0.914546	0.0544069	0.159696	0.25845	0.349451	0.43157	0.503955	0.566311	0.619051	0.663203	0.700129	0.731214	0.75768	0.780502	0.800426	0.81801	0.829276	0.838334	0.846301	0.853335	0.859578	0.865149	0.870149	0.87466	0.878749	0.882475	0.885882	0.889011	0.891895	0.89456	0.897032	0.89933	0.901473	0.903476	0.905352	0.907112	0.908768	0.910328	0.911801	0.913193	0.914511	0.915761	0.916948	0.918077	0.919151	0.920175	0.921152	0.922086	0.922979	0.923833
0.934647	0.0545209	0.160107	0.259257	0.350754	0.433458	0.506489	0.569511	0.622897	0.667643	0.705096	0.736642	0.763508	0.786679	0.806911	0.824768	0.836492	0.845723	0.853842	0.861011	0.867374	0.873052	0.878148	0.882745	0.886913	0.890709	0.894182	0.89737	0.900308	0.903024	0.905543	0.907885	0.910069	0.912109	0.91402	0.915814	0.917502	0.919091	0.920592	0.92201	0.923353	0.924627	0.925836	0.926986	0.928081	0.929124	0.93012	0.931071	0.93198	0.932851
0.954747	0.0546307	0.160502	0.260035	0.352013	0.435284	0.508944	0.572618	0.626637	0.671967	0.70994	0.74194	0.7692	0.792716	0.813252	0.831379	0.843556	0.852958	0.861229	0.868533	0.875014	0.880798	0.885989	0.890672	0.894917	0.898784	0.902321	0.905568	0.90856	0.911327	0.913892	0.916277	0.918501	0.920579	0.922526	0.924353	0.926071	0.92769	0.929218	0.930662	0.93203	0.933327	0.934559	0.93573	0.936845	0.937907	0.938921	0.93989	0.940816	0.941702
0.974849	0.0547364	0.160884	0.260786	0.353229	0.437052	0.511324	0.575635	0.630275	0.67618	0.714665	0.747112	0.774762	0.798619	0.819454	0.837849	0.850475	0.860047	0.868468	0.875905	0.882504	0.888393	0.893678	0.898446	0.902768	0.906705	0.910305	0.913611	0.916658	0.919474	0.922085	0.924513	0.926777	0.928892	0.930874	0.932733	0.934482	0.93613	0.937686	0.939156	0.940549	0.941869	0.943122	0.944314	0.945449	0.946531	0.947563	0.948548	0.949491	0.950393
0.99495	0.0548383	0.161252	0.261511	0.354406	0.438764	0.513633	0.578567	0.633816	0.680287	0.719275	0.752165	0.780199	0.804392	0.825524	0.844182	0.857254	0.866995	0.875565	0.883133	0.889849	0.895843	0.901221	0.906073	0.910471	0.914477	0.918141	0.921505	0.924605	0.92747	0.930127	0.932598	0.934901	0.937053	0.93907	0.940962	0.942741	0.944418	0.946001	0.947497	0.948913	0.950256	0.951532	0.952744	0.953899	0.954999	0.956049	0.957052	0.958012	0.958929
1.01505	0.0549366	0.161607	0.262212	0.355544	0.440423	0.515874	0.581417	0.637264	0.68429	0.723776	0.757102	0.785516	0.810041	0.831465	0.850384	0.863897	0.873806	0.882523	0.890222	0.897054	0.903152	0.908622	0.913558	0.918032	0.922106	0.925833	0.929254	0.932407	0.935321	0.938024	0.940536	0.942879	0.945068	0.947118	0.949043	0.950853	0.952558	0.954167	0.955689	0.957129	0.958495	0.959793	0.961026	0.9622	0.963319	0.964387	0.965407	0.966382	0.967316
1.03515	0.0550314	0.16195	0.26289	0.356645	0.442031	0.51805	0.584189	0.640623	0.688196	0.728172	0.761927	0.790716	0.815569	0.837283	0.85646	0.870411	0.880485	0.889349	0.897177	0.904125	0.910324	0.915887	0.920905	0.925454	0.929597	0.933386	0.936864	0.940069	0.943032	0.94578	0.948334	0.950716	0.952941	0.955025	0.956982	0.958822	0.960555	0.962191	0.963738	0.965202	0.966591	0.96791	0.969163	0.970357	0.971495	0.97258	0.973617	0.974608	0.975557
1.05525	0.055123	0.162282	0.263546	0.357712	0.44359	0.520163	0.586885	0.643896	0.692006	0.732466	0.766646	0.795805	0.820982	0.842982	0.862413	0.876798	0.887037	0.896046	0.904003	0.911065	0.917366	0.92302	0.92812	0.932743	0.936953	0.940804	0.944339	0.947597	0.950608	0.9534	0.955996	0.958416	0.960677	0.962795	0.964783	0.966653	0.968414	0.970077	0.971649	0.973137	0.974548	0.975888	0.977162	0.978375	0.979531	0.980634	0.981687	0.982695	0.983659
1.07535	0.0552115	0.162603	0.26418	0.358746	0.445103	0.522217	0.58951	0.647086	0.695726	0.736662	0.771261	0.800786	0.826283	0.848566	0.868248	0.883064	0.893466	0.902619	0.910703	0.917878	0.924281	0.930025	0.935206	0.939903	0.944181	0.948093	0.951684	0.954993	0.958052	0.960888	0.963525	0.965983	0.968281	0.970432	0.972452	0.974351	0.97614	0.977829	0.979425	0.980937	0.98237	0.983731	0.985025	0.986258	0.987432	0.988552	0.989622	0.990646	0.991625
1.09546	0.0552971	0.162913	0.264795	0.359749	0.446572	0.524213	0.592066	0.650197	0.699358	0.740764	0.775776	0.805663	0.831477	0.854039	0.87397	0.889212	0.899776	0.909072	0.917283	0.92457	0.931072	0.936907	0.942169	0.946939	0.951283	0.955255	0.958902	0.962263	0.965369	0.968249	0.970927	0.973423	0.975756	0.977941	0.979991	0.98192	0.983737	0.985451	0.987073	0.988607	0.990063	0.991445	0.992759	0.99401	0.995202	0.99634	0.997426	0.998466	0.99946
1.11556	0.0553799	0.163214	0.26539	0.360721	0.447999	0.526155	0.594555	0.653231	0.702906	0.744775	0.780196	0.81044	0.836566	0.859405	0.879582	0.895246	0.905971	0.915408	0.923745	0.931144	0.937746	0.943669	0.949011	0.953854	0.958264	0.962296	0.965999	0.96941	0.972563	0.975487	0.978205	0.980739	0.983107	0.985325	0.987406	0.989364	0.991208	0.992949	0.994594	0.996152	0.997629	0.999032	1.00037	1.00164	1.00285	1.004	1.0051	1.00616	1.00717
1.13566	0.05546	0.163505	0.265968	0.361664	0.449384	0.528044	0.59698	0.656192	0.706373	0.748699	0.784523	0.815119	0.841555	0.864667	0.885087	0.90117	0.912055	0.921633	0.930094	0.937603	0.944304	0.950315	0.955737	0.960652	0.965127	0.96922	0.972977	0.976438	0.979638	0.982605	0.985363	0.987935	0.990337	0.992588	0.9947	0.996686	0.998558	1.00032	1.00199	1.00358	1.00507	1.0065	1.00785	1.00914	1.01037	1.01154	1.01266	1.01373	1.01475
1.15576	0.0555377	0.163787	0.266527	0.36258	0.450732	0.529883	0.599344	0.659083	0.709761	0.752538	0.788761	0.819706	0.846447	0.869829	0.890489	0.906987	0.918031	0.927748	0.936333	0.943952	0.95075	0.956849	0.96235	0.967336	0.971877	0.976028	0.97984	0.983352	0.986598	0.989607	0.992406	0.995014	0.997452	0.999734	1.00188	1.00389	1.00579	1.00758	1.00928	1.01088	1.0124	1.01384	1.01522	1.01652	1.01777	1.01896	1.02009	1.02118	1.02222
1.17586	0.0556128	0.16406	0.26707	0.36347	0.452041	0.531673	0.60165	0.661905	0.713074	0.756296	0.792912	0.824201	0.851245	0.874893	0.895792	0.9127	0.923903	0.933758	0.942465	0.950193	0.957089	0.963275	0.968854	0.973911	0.978516	0.982727	0.986592	0.990154	0.993445	0.996498	0.999335	1.00198	1.00445	1.00677	1.00894	1.01098	1.01291	1.01473	1.01644	1.01807	1.01961	1.02107	1.02247	1.02379	1.02506	1.02626	1.02741	1.02851	1.02957
1.19596	0.0556857	0.164326	0.267598	0.364334	0.453316	0.533417	0.603898	0.664662	0.716313	0.759974	0.796979	0.828609	0.855952	0.879865	0.900999	0.918313	0.929673	0.939666	0.948495	0.956331	0.963323	0.969595	0.975252	0.980379	0.985048	0.989317	0.993236	0.996847	1.00019	1.00328	1.00616	1.00884	1.01134	1.01369	1.01589	1.01797	1.01992	1.02176	1.0235	1.02515	1.02671	1.02819	1.02961	1.03095	1.03223	1.03345	1.03462	1.03574	1.0368
1.21606	0.0557564	0.164583	0.26811	0.365174	0.454556	0.535116	0.606092	0.667356	0.719483	0.763577	0.800966	0.832933	0.860571	0.884745	0.906112	0.923828	0.935346	0.945475	0.954424	0.962368	0.969455	0.975813	0.981547	0.986745	0.991477	0.995804	0.999776	1.00344	1.00682	1.00995	1.01287	1.01559	1.01813	1.02051	1.02274	1.02484	1.02682	1.02868	1.03045	1.03212	1.0337	1.03521	1.03664	1.038	1.0393	1.04053	1.04172	1.04285	1.04393
1.23616	0.055825	0.164833	0.268607	0.365991	0.455763	0.536772	0.608233	0.669988	0.722584	0.767106	0.804874	0.837175	0.865105	0.889537	0.911135	0.929247	0.940924	0.951188	0.960257	0.968307	0.975489	0.981932	0.987743	0.993009	0.997804	1.00219	1.00621	1.00992	1.01335	1.01653	1.01948	1.02224	1.02481	1.02722	1.02948	1.03161	1.03361	1.0355	1.03729	1.03898	1.04059	1.04211	1.04356	1.04494	1.04626	1.04751	1.04871	1.04986	1.05095
1.25626	0.0558916	0.165076	0.269091	0.366786	0.456938	0.538387	0.610324	0.672562	0.725619	0.770563	0.808707	0.841337	0.869556	0.894244	0.91607	0.934573	0.946409	0.956807	0.965995	0.974151	0.981427	0.987955	0.993841	0.999177	1.00403	1.00848	1.01255	1.01631	1.01978	1.023	1.02599	1.02878	1.03139	1.03383	1.03612	1.03828	1.04031	1.04222	1.04403	1.04575	1.04737	1.04892	1.05039	1.05178	1.05312	1.05439	1.0556	1.05676	1.05787
1.27636	0.0559562	0.165312	0.269561	0.36756	0.458083	0.539962	0.612366	0.675078	0.728591	0.773952	0.812466	0.845422	0.873928	0.898868	0.92092	0.939806	0.951805	0.962336	0.971642	0.979902	0.987272	0.993884	0.999846	1.00525	1.01017	1.01467	1.0188	1.0226	1.02612	1.02938	1.03241	1.03523	1.03787	1.04035	1.04266	1.04485	1.0469	1.04884	1.05068	1.05241	1.05406	1.05562	1.05711	1.05852	1.05987	1.06116	1.06239	1.06356	1.06469
1.29646	0.0560191	0.165541	0.270019	0.368313	0.459199	0.541499	0.61436	0.67754	0.731502	0.777274	0.816155	0.849432	0.878221	0.903413	0.925687	0.945002	0.957114	0.967777	0.9772	0.985564	0.993027	0.999722	1.00576	1.01123	1.01621	1.02077	1.02495	1.0288	1.03236	1.03566	1.03873	1.04159	1.04426	1.04676	1.04911	1.05132	1.0534	1.05537	1.05722	1.05898	1.06065	1.06223	1.06374	1.06517	1.06653	1.06784	1.06908	1.07027	1.07141
1.31657	0.0560801	0.165764	0.270464	0.369046	0.460287	0.542998	0.616309	0.679948	0.734353	0.780532	0.819774	0.853371	0.88244	0.907879	0.930375	0.950075	0.962338	0.973132	0.982672	0.991139	0.998695	1.00547	1.01158	1.01712	1.02216	1.02677	1.03101	1.03491	1.03851	1.04185	1.04496	1.04785	1.05056	1.05309	1.05547	1.0577	1.05981	1.0618	1.06368	1.06546	1.06714	1.06875	1.07027	1.07172	1.0731	1.07442	1.07568	1.07688	1.07804
1.33667	0.0561395	0.165981	0.270897	0.36976	0.461348	0.544462	0.618214	0.682305	0.737146	0.783726	0.823327	0.857239	0.886586	0.91227	0.934984	0.95506	0.96748	0.978405	0.988059	0.99663	1.00428	1.01114	1.01732	1.02293	1.02803	1.0327	1.03698	1.04092	1.04457	1.04795	1.05109	1.05402	1.05676	1.05933	1.06173	1.064	1.06613	1.06814	1.07004	1.07184	1.07355	1.07517	1.07671	1.07818	1.07958	1.08091	1.08218	1.0834	1.08457
1.35677	0.0561972	0.166192	0.271319	0.370457	0.462382	0.545892	0.620077	0.684613	0.739883	0.78686	0.826816	0.861039	0.89066	0.916587	0.939519	0.959942	0.972543	0.983596	0.993366	1.00204	1.00978	1.01672	1.02297	1.02865	1.03381	1.03853	1.04286	1.04686	1.05055	1.05397	1.05715	1.06011	1.06288	1.06547	1.06791	1.0702	1.07235	1.07439	1.07631	1.07814	1.07986	1.0815	1.08306	1.08455	1.08596	1.08731	1.0886	1.08983	1.09101
1.37687	0.0562535	0.166397	0.27173	0.371135	0.463392	0.547288	0.621898	0.686872	0.742567	0.789935	0.830241	0.864773	0.894666	0.920833	0.943979	0.964636	0.977528	0.988709	0.998592	1.00737	1.01519	1.02222	1.02855	1.03428	1.03951	1.04428	1.04867	1.05271	1.05644	1.0599	1.06311	1.06611	1.06891	1.07154	1.074	1.07632	1.0785	1.08056	1.0825	1.08434	1.08609	1.08775	1.08933	1.09083	1.09226	1.09363	1.09493	1.09618	1.09737
1.39697	0.0563082	0.166597	0.27213	0.371797	0.464377	0.548653	0.62368	0.689085	0.745198	0.792953	0.833605	0.868443	0.898605	0.92501	0.948369	0.969217	0.982437	0.993746	1.00374	1.01262	1.02053	1.02764	1.03404	1.03984	1.04513	1.04995	1.05439	1.05847	1.06225	1.06575	1.069	1.07203	1.07486	1.07752	1.08001	1.08235	1.08456	1.08664	1.08861	1.09047	1.09224	1.09391	1.09551	1.09703	1.09847	1.09986	1.10117	1.10244	1.10364
1.41707	0.0563614	0.166792	0.272521	0.372443	0.46534	0.549986	0.625424	0.691252	0.747778	0.795916	0.836911	0.872051	0.902479	0.92912	0.952689	0.973726	0.987273	0.998708	1.00882	1.01779	1.0258	1.03298	1.03945	1.04532	1.05066	1.05555	1.06003	1.06416	1.06798	1.07151	1.0748	1.07787	1.08073	1.08342	1.08594	1.0883	1.09053	1.09264	1.09463	1.09651	1.0983	1.09999	1.10161	1.10314	1.10461	1.106	1.10733	1.10861	1.10983
1.43717	0.0564133	0.166982	0.272902	0.373073	0.466279	0.55129	0.62713	0.693376	0.750309	0.798825	0.840158	0.875598	0.906289	0.933164	0.956942	0.978167	0.992037	1.0036	1.01382	1.02289	1.03099	1.03825	1.04479	1.05072	1.05613	1.06106	1.0656	1.06977	1.07363	1.0772	1.08053	1.08363	1.08652	1.08924	1.09178	1.09418	1.09643	1.09856	1.10057	1.10247	1.10428	1.106	1.10763	1.10918	1.11066	1.11207	1.11342	1.1147	1.11594
1.45727	0.0564639	0.167168	0.273273	0.373688	0.467197	0.552565	0.6288	0.695458	0.752793	0.801681	0.84335	0.879086	0.910038	0.937144	0.961128	0.98254	0.996732	1.00842	1.01875	1.02792	1.0361	1.04344	1.05006	1.05605	1.06151	1.0665	1.07109	1.0753	1.0792	1.08282	1.08618	1.08931	1.09224	1.09498	1.09755	1.09997	1.10225	1.1044	1.10643	1.10836	1.11018	1.11192	1.11356	1.11513	1.11663	1.11805	1.11942	1.12072	1.12197
1.47737	0.0565132	0.167348	0.273635	0.374288	0.468094	0.553811	0.630436	0.697498	0.755229	0.804487	0.846488	0.882517	0.913728	0.941063	0.965252	0.986847	1.00136	1.01317	1.02361	1.03288	1.04115	1.04856	1.05525	1.06131	1.06683	1.07187	1.0765	1.08076	1.08471	1.08836	1.09176	1.09492	1.09788	1.10065	1.10325	1.10569	1.108	1.11017	1.11222	1.11417	1.11601	1.11776	1.11943	1.12101	1.12252	1.12396	1.12534	1.12666	1.12792
1.49747	0.0565613	0.167524	0.273989	0.374874	0.46897	0.555031	0.632038	0.699499	0.757621	0.807243	0.849572	0.885892	0.917359	0.944921	0.969312	0.99109	1.00592	1.01785	1.0284	1.03777	1.04612	1.05362	1.06038	1.0665	1.07207	1.07717	1.08185	1.08615	1.09014	1.09383	1.09726	1.10046	1.10345	1.10624	1.10887	1.11134	1.11367	1.11586	1.11794	1.1199	1.12177	1.12353	1.12522	1.12682	1.12834	1.1298	1.13119	1.13252	1.13379
1.51758	0.0566081	0.167696	0.274334	0.375447	0.469827	0.556225	0.633607	0.701461	0.759969	0.809952	0.852606	0.889213	0.920934	0.94872	0.973313	0.995272	1.01042	1.02247	1.03313	1.04259	1.05103	1.0586	1.06543	1.07162	1.07725	1.0824	1.08712	1.09147	1.0955	1.09922	1.10269	1.10592	1.10894	1.11177	1.11442	1.11692	1.11926	1.12148	1.12358	1.12556	1.12745	1.12923	1.13093	1.13255	1.13409	1.13556	1.13697	1.13831	1.1396
1.53768	0.0566539	0.167864	0.274671	0.376007	0.470666	0.557393	0.635144	0.703385	0.762275	0.812614	0.855589	0.892482	0.924454	0.952463	0.977254	0.999392	1.01485	1.02703	1.03779	1.04735	1.05587	1.06352	1.07042	1.07667	1.08236	1.08756	1.09233	1.09672	1.10079	1.10455	1.10805	1.11132	1.11437	1.11722	1.1199	1.12242	1.12479	1.12703	1.12915	1.13116	1.13306	1.13486	1.13658	1.13821	1.13977	1.14125	1.14267	1.14403	1.14533
1.55778	0.0566985	0.168028	0.275	0.376554	0.471485	0.558537	0.636651	0.705273	0.764539	0.81523	0.858524	0.895698	0.927919	0.956149	0.981137	1.00345	1.01922	1.03152	1.04239	1.05204	1.06065	1.06838	1.07534	1.08165	1.0874	1.09265	1.09747	1.10191	1.10601	1.10981	1.11335	1.11665	1.11972	1.12261	1.12531	1.12786	1.13026	1.13252	1.13465	1.13668	1.1386	1.14042	1.14215	1.1438	1.14538	1.14688	1.14831	1.14968	1.15099
1.57788	0.0567421	0.168188	0.275322	0.377089	0.472287	0.559657	0.638128	0.707126	0.766763	0.817803	0.861411	0.898865	0.931333	0.959781	0.984965	1.00746	1.02353	1.03595	1.04693	1.05667	1.06537	1.07317	1.08021	1.08658	1.09238	1.09768	1.10255	1.10703	1.11117	1.11501	1.11858	1.12191	1.12502	1.12793	1.13066	1.13323	1.13565	1.13793	1.14009	1.14213	1.14407	1.14591	1.14766	1.14933	1.15091	1.15243	1.15388	1.15526	1.15658
1.59798	0.0567847	0.168345	0.275637	0.377612	0.473072	0.560754	0.639576	0.708944	0.768948	0.820332	0.864253	0.901984	0.934696	0.96336	0.988738	1.01141	1.02779	1.04032	1.0514	1.06125	1.07003	1.0779	1.085	1.09144	1.09729	1.10265	1.10756	1.11208	1.11627	1.12014	1.12375	1.12711	1.13024	1.13318	1.13594	1.13853	1.14098	1.14328	1.14546	1.14752	1.14948	1.15134	1.15311	1.15479	1.15639	1.15792	1.15938	1.16077	1.16211
1.61808	0.0568263	0.168497	0.275944	0.378123	0.47384	0.561829	0.640996	0.710729	0.771096	0.82282	0.867049	0.905054	0.938008	0.966888	0.992457	1.0153	1.03198	1.04464	1.05583	1.06576	1.07462	1.08257	1.08974	1.09624	1.10215	1.10755	1.11251	1.11708	1.1213	1.12521	1.12885	1.13224	1.13541	1.13837	1.14116	1.14377	1.14624	1.14857	1.15077	1.15285	1.15482	1.1567	1.15848	1.16018	1.1618	1.16334	1.16481	1.16622	1.16757
1.63818	0.0568669	0.168647	0.276245	0.378624	0.474592	0.562882	0.642389	0.712482	0.773206	0.825267	0.869802	0.908079	0.941273	0.970365	0.996125	1.01914	1.03612	1.0489	1.06019	1.07021	1.07916	1.08719	1.09442	1.10098	1.10694	1.1124	1.1174	1.12201	1.12627	1.13022	1.13389	1.13731	1.14051	1.1435	1.14631	1.14895	1.15144	1.15379	1.15601	1.15811	1.1601	1.162	1.1638	1.16551	1.16714	1.1687	1.17019	1.17161	1.17297
1.65828	0.0569066	0.168793	0.276539	0.379114	0.475329	0.563914	0.643756	0.714203	0.77528	0.827674	0.872512	0.911058	0.94449	0.973793	0.999741	1.02292	1.04021	1.0531	1.06449	1.07461	1.08364	1.09174	1.09904	1.10566	1.11168	1.11718	1.12223	1.12688	1.13118	1.13517	1.13887	1.14233	1.14555	1.14857	1.15141	1.15407	1.15658	1.15895	1.16119	1.16331	1.16532	1.16723	1.16905	1.17078	1.17242	1.17399	1.1755	1.17693	1.1783
1.67838	0.0569454	0.168936	0.276826	0.379593	0.476051	0.564926	0.645097	0.715893	0.777319	0.830043	0.875181	0.913993	0.947661	0.977173	1.00331	1.02666	1.04424	1.05725	1.06875	1.07896	1.08807	1.09624	1.10361	1.11028	1.11636	1.12191	1.12701	1.1317	1.13604	1.14006	1.14379	1.14728	1.15053	1.15358	1.15644	1.15913	1.16166	1.16406	1.16631	1.16846	1.17048	1.17241	1.17424	1.17599	1.17765	1.17923	1.18075	1.18219	1.18358
1.69849	0.0569834	0.169075	0.277108	0.380063	0.476757	0.565918	0.646412	0.717554	0.779324	0.832375	0.877809	0.916885	0.950787	0.980507	1.00683	1.03035	1.04822	1.06135	1.07295	1.08325	1.09244	1.10068	1.10812	1.11485	1.12098	1.12658	1.13172	1.13646	1.14083	1.14489	1.14866	1.15217	1.15546	1.15853	1.16142	1.16413	1.16669	1.1691	1.17138	1.17354	1.17558	1.17753	1.17937	1.18113	1.18281	1.18441	1.18594	1.1874	1.1888
1.71859	0.0570205	0.169212	0.277384	0.380522	0.47745	0.566891	0.647704	0.719185	0.781296	0.834669	0.880397	0.919736	0.953869	0.983794	1.0103	1.03398	1.05215	1.06539	1.07709	1.08749	1.09676	1.10508	1.11257	1.11936	1.12555	1.1312	1.13638	1.14116	1.14558	1.14967	1.15347	1.15701	1.16033	1.16343	1.16634	1.16907	1.17165	1.17409	1.17639	1.17856	1.18063	1.18259	1.18445	1.18622	1.18791	1.18953	1.19107	1.19254	1.19395
1.73869	0.0570568	0.169346	0.277653	0.380972	0.478129	0.567846	0.648972	0.720788	0.783235	0.836928	0.882947	0.922545	0.956908	0.987037	1.01372	1.03757	1.05604	1.06939	1.08119	1.09167	1.10103	1.10941	1.11698	1.12383	1.13006	1.13576	1.14099	1.14581	1.15026	1.15439	1.15822	1.1618	1.16514	1.16827	1.1712	1.17396	1.17656	1.17901	1.18134	1.18353	1.18561	1.18759	1.18947	1.19126	1.19296	1.19459	1.19614	1.19763	1.19905
1.75879	0.0570923	0.169477	0.277917	0.381414	0.478794	0.568782	0.650217	0.722364	0.785143	0.839152	0.885459	0.925315	0.959905	0.990237	1.0171	1.04112	1.05987	1.07333	1.08524	1.09581	1.10524	1.1137	1.12133	1.12824	1.13453	1.14027	1.14555	1.15041	1.1549	1.15906	1.16292	1.16653	1.1699	1.17305	1.17601	1.1788	1.18142	1.18389	1.18623	1.18844	1.19054	1.19254	1.19443	1.19624	1.19796	1.1996	1.20116	1.20266	1.20409
1.77889	0.0571271	0.169605	0.278176	0.381846	0.479447	0.5697	0.65144	0.723913	0.787021	0.841341	0.887935	0.928045	0.962862	0.993393	1.02044	1.04461	1.06365	1.07723	1.08924	1.0999	1.10941	1.11794	1.12563	1.1326	1.13894	1.14473	1.15005	1.15495	1.15948	1.16367	1.16757	1.17121	1.1746	1.17778	1.18077	1.18358	1.18622	1.18871	1.19107	1.1933	1.19542	1.19743	1.19934	1.20116	1.20289	1.20455	1.20613	1.20764	1.20908
1.79899	0.0571612	0.16973	0.27843	0.38227	0.480087	0.570602	0.65264	0.725436	0.788868	0.843498	0.890374	0.930737	0.965778	0.996509	1.02373	1.04807	1.06739	1.08109	1.09319	1.10394	1.11353	1.12213	1.12988	1.13691	1.1433	1.14914	1.1545	1.15944	1.16401	1.16824	1.17217	1.17583	1.17926	1.18246	1.18547	1.1883	1.19097	1.19348	1.19586	1.19811	1.20025	1.20227	1.2042	1.20603	1.20778	1.20945	1.21104	1.21256	1.21402
1.81909	0.0571945	0.169853	0.278678	0.382685	0.480714	0.571487	0.65382	0.726933	0.790686	0.845622	0.892779	0.933393	0.968655	0.999583	1.02698	1.05148	1.07108	1.08489	1.09709	1.10793	1.1176	1.12627	1.13408	1.14117	1.14761	1.1535	1.15891	1.16389	1.16849	1.17275	1.17672	1.18041	1.18386	1.18709	1.19013	1.19298	1.19566	1.1982	1.2006	1.20287	1.20502	1.20706	1.209	1.21085	1.21261	1.21429	1.2159	1.21743	1.2189
1.83919	0.0572272	0.169974	0.278921	0.383092	0.48133	0.572356	0.65498	0.728406	0.792475	0.847715	0.895149	0.936012	0.971494	1.00262	1.03019	1.05485	1.07473	1.08865	1.10095	1.11187	1.12162	1.13036	1.13824	1.14538	1.15187	1.15781	1.16326	1.16828	1.17292	1.17722	1.18121	1.18494	1.18841	1.19167	1.19473	1.19761	1.20031	1.20287	1.20528	1.20757	1.20974	1.2118	1.21375	1.21562	1.21739	1.21909	1.22071	1.22225	1.22373
1.85929	0.0572592	0.170092	0.27916	0.383491	0.481934	0.573209	0.656119	0.729854	0.794237	0.849777	0.897486	0.938595	0.974296	1.00561	1.03336	1.05817	1.07833	1.09237	1.10476	1.11577	1.1256	1.13441	1.14235	1.14955	1.15609	1.16208	1.16757	1.17263	1.1773	1.18163	1.18566	1.18941	1.19292	1.1962	1.19928	1.20218	1.20491	1.20749	1.20992	1.21223	1.21441	1.21649	1.21846	1.22034	1.22212	1.22383	1.22546	1.22702	1.22852
1.87939	0.0572906	0.170207	0.279394	0.383883	0.482527	0.574047	0.657239	0.731279	0.795972	0.851808	0.899791	0.941144	0.977062	1.00857	1.03649	1.06146	1.08189	1.09604	1.10853	1.11963	1.12953	1.13841	1.14641	1.15366	1.16026	1.1663	1.17183	1.17693	1.18164	1.186	1.19006	1.19384	1.19738	1.20069	1.20379	1.20671	1.20946	1.21206	1.21451	1.21683	1.21903	1.22113	1.22311	1.225	1.22681	1.22853	1.23017	1.23174	1.23325
1.89949	0.0573213	0.170321	0.279623	0.384267	0.483109	0.574869	0.658339	0.732681	0.79768	0.85381	0.902063	0.943658	0.979791	1.01149	1.03958	1.0647	1.08541	1.09967	1.11226	1.12344	1.13342	1.14237	1.15043	1.15774	1.16439	1.17047	1.17605	1.18118	1.18593	1.19033	1.19442	1.19823	1.20179	1.20512	1.20825	1.21119	1.21396	1.21658	1.21905	1.22139	1.22361	1.22572	1.22772	1.22962	1.23144	1.23318	1.23483	1.23642	1.23793
1.9196	0.0573514	0.170432	0.279848	0.384645	0.483681	0.575678	0.659422	0.73406	0.799362	0.855783	0.904304	0.94614	0.982486	1.01438	1.04264	1.06791	1.08888	1.10326	1.11594	1.12721	1.13727	1.14628	1.15441	1.16177	1.16847	1.1746	1.18022	1.18539	1.19017	1.19461	1.19873	1.20257	1.20615	1.20951	1.21266	1.21563	1.21842	1.22105	1.22355	1.2259	1.22814	1.23026	1.23228	1.2342	1.23603	1.23778	1.23944	1.24104	1.24257
1.9397	0.057381	0.170541	0.280069	0.385015	0.484242	0.576472	0.660486	0.735418	0.801019	0.857728	0.906515	0.948588	0.985146	1.01722	1.04565	1.07108	1.09239	1.10681	1.11959	1.13094	1.14107	1.15015	1.15834	1.16576	1.17251	1.17868	1.18434	1.18956	1.19437	1.19884	1.20299	1.20686	1.21047	1.21386	1.21703	1.22002	1.22283	1.22548	1.22799	1.23037	1.23262	1.23476	1.23679	1.23873	1.24057	1.24233	1.24401	1.24562	1.24716
1.9598	0.0574099	0.170648	0.280286	0.385378	0.484793	0.577253	0.661532	0.736754	0.802651	0.859646	0.908695	0.951005	0.987773	1.02004	1.04863	1.07421	1.0958	1.11032	1.12319	1.13463	1.14483	1.15399	1.16223	1.16971	1.17651	1.18272	1.18843	1.19368	1.19853	1.20303	1.20721	1.21111	1.21475	1.21816	1.22135	1.22436	1.2272	1.22987	1.2324	1.23479	1.23706	1.23921	1.24126	1.24321	1.24507	1.24684	1.24853	1.25015	1.2517
1.9799	0.0574383	0.170753	0.280498	0.385734	0.485334	0.57802	0.662562	0.738069	0.804259	0.861537	0.910847	0.953391	0.990367	1.02282	1.05158	1.0773	1.09916	1.11379	1.12676	1.13828	1.14856	1.15777	1.16609	1.17361	1.18046	1.18672	1.19247	1.19776	1.20265	1.20718	1.21139	1.21531	1.21898	1.22241	1.22564	1.22866	1.23152	1.23421	1.23676	1.23917	1.24145	1.24362	1.24568	1.24765	1.24952	1.2513	1.25301	1.25464	1.2562
2	0.0574662	0.170856	0.280707	0.386085	0.485866	0.578774	0.663574	0.739364	0.805844	0.863401	0.91297	0.955747	0.99293	1.02556	1.05449	1.08036	1.10249	1.11722	1.13028	1.14189	1.15224	1.16152	1.16989	1.17748	1.18437	1.19068	1.19647	1.20179	1.20672	1.21128	1.21552	1.21948	1.22317	1.22663	1.22987	1.23292	1.2358	1.23851	1.24107	1.2435	1.2458	1.24799	1.25006	1.25204	1.25393	1.25572	1.25744	1.25908	1.26066
[truncated: 51 more columns]

## Sheet: RO2_NH3
OXYGEN PRODUCTION RATE (mmolO2.L.h-1) FUNCTION OF LIGHT FLUX Q0(W/m2) AND BIOMASS (g/L) - NH3 source
q0(W/m2)/X(g/L)	2	3.49495	4.9899	6.48485	7.9798	9.47475	10.9697	12.4647	13.9596	15.4545	16.9495	18.4444	19.9394	21.4343	22.9293	24.4242	25.9192	27.4141	28.9091	30.404	31.899	33.3939	34.8889	36.3838	37.8788	39.3737	40.8687	42.3636	43.8586	45.3535	46.8485	48.3434	49.8384	51.3333	52.8283	54.3232	55.8182	57.3131	58.8081	60.303	61.798	63.2929	64.7879	66.2828	67.7778	69.2727	70.7677	72.2626	73.7576
0.01	0.00989573	0.0247144	0.0342743	0.0403146	0.0441508	0.0466486	0.0483369	0.0481844	0.0475911	0.0472349	0.0470063	0.0468495	0.0467354	0.0466481	0.0465788	0.0465219	0.0464743	0.0464337	0.0463985	0.0463677	0.0463405	0.0463162	0.0462944	0.0462747	0.0462569	0.0462406	0.0462257	0.0462119	0.0461992	0.0461875	0.0461766	0.0461664	0.046157	0.0461481	0.0461397	0.0461319	0.0461245	0.0461176	0.046111	0.0461048	0.0460989	0.0460933	0.0460879	0.0460829	0.046078	0.0460734	0.046069	0.0460648	0.0460608
0.030101	0.015095	0.0384815	0.0542782	0.064683	0.0715236	0.0760978	0.07925	0.0815043	0.0824294	0.0821681	0.0820738	0.0820572	0.0820754	0.0821078	0.0821449	0.0821822	0.0822178	0.082251	0.0822817	0.0823099	0.0823358	0.0823595	0.0823813	0.0824014	0.08242	0.0824371	0.082453	0.0824678	0.0824815	0.0824944	0.0825064	0.0825176	0.0825282	0.0825381	0.0825475	0.0825563	0.0825646	0.0825725	0.08258	0.0825871	0.0825938	0.0826003	0.0826064	0.0826122	0.0826178	0.0826231	0.0826282	0.082633	0.0826377
0.050202	0.0191622	0.0496475	0.0710001	0.0855387	0.0953643	0.102074	0.106767	0.110156	0.112693	0.113575	0.113687	0.113873	0.114076	0.114273	0.114455	0.114619	0.114767	0.114899	0.115018	0.115124	0.115221	0.115308	0.115387	0.11546	0.115526	0.115587	0.115644	0.115696	0.115745	0.11579	0.115832	0.115871	0.115908	0.115943	0.115975	0.116006	0.116035	0.116062	0.116088	0.116112	0.116136	0.116158	0.116179	0.116199	0.116218	0.116237	0.116254	0.116271	0.116287
0.070303	0.0224393	0.0589114	0.0852276	0.103646	0.116385	0.125237	0.131506	0.136071	0.139504	0.142171	0.142552	0.142975	0.143394	0.143782	0.144131	0.144442	0.144718	0.144963	0.145182	0.145378	0.145555	0.145714	0.14586	0.145992	0.146113	0.146224	0.146327	0.146422	0.146509	0.146591	0.146668	0.146739	0.146805	0.146868	0.146927	0.146982	0.147034	0.147084	0.14713	0.147175	0.147217	0.147257	0.147295	0.147331	0.147365	0.147398	0.14743	0.14746	0.147489
0.090404	0.0251395	0.0667318	0.0974993	0.119544	0.135096	0.14607	0.153923	0.159682	0.164033	0.167422	0.16912	0.169804	0.170458	0.171054	0.171585	0.172054	0.17247	0.172838	0.173166	0.173459	0.173722	0.17396	0.174176	0.174373	0.174553	0.174718	0.174871	0.175011	0.175142	0.175263	0.175376	0.175482	0.17558	0.175673	0.17576	0.175842	0.175919	0.175992	0.176062	0.176127	0.176189	0.176248	0.176305	0.176358	0.176409	0.176458	0.176505	0.176549	0.176592
0.110505	0.0274043	0.073427	0.108203	0.13363	0.151883	0.164937	0.174369	0.181328	0.186605	0.190726	0.193722	0.194682	0.195586	0.196401	0.197125	0.197762	0.198325	0.198822	0.199265	0.19966	0.200015	0.200335	0.200626	0.20089	0.201132	0.201354	0.201559	0.201748	0.201923	0.202085	0.202237	0.202378	0.202511	0.202635	0.202752	0.202862	0.202965	0.203063	0.203156	0.203244	0.203327	0.203406	0.203482	0.203553	0.203622	0.203687	0.20375	0.203809	0.203867
0.130606	0.029332	0.0792265	0.117626	0.146207	0.167044	0.182128	0.193119	0.201274	0.207481	0.212337	0.21624	0.217864	0.219027	0.220071	0.220994	0.221806	0.222521	0.223153	0.223714	0.224215	0.224664	0.22507	0.225438	0.225772	0.226078	0.226359	0.226617	0.226856	0.227077	0.227282	0.227474	0.227652	0.22782	0.227976	0.228124	0.228263	0.228393	0.228517	0.228634	0.228745	0.22885	0.22895	0.229045	0.229135	0.229222	0.229304	0.229383	0.229458	0.22953
0.150707	0.0309931	0.0843003	0.12599	0.157513	0.180815	0.197871	0.210397	0.21974	0.226871	0.232462	0.23696	0.239555	0.240983	0.242261	0.243389	0.24438	0.245251	0.246021	0.246704	0.247313	0.24786	0.248352	0.248799	0.249205	0.249577	0.249917	0.250231	0.25052	0.250789	0.251038	0.25127	0.251487	0.251689	0.251879	0.252058	0.252226	0.252385	0.252535	0.252677	0.252811	0.252938	0.253059	0.253175	0.253284	0.253389	0.253489	0.253584	0.253675	0.253763
0.170808	0.0324396	0.0887778	0.133466	0.167735	0.193388	0.212354	0.226386	0.236901	0.244951	0.251273	0.256365	0.259924	0.261621	0.263137	0.264474	0.265646	0.266677	0.267587	0.268394	0.269113	0.269758	0.27034	0.270866	0.271345	0.271783	0.272185	0.272554	0.272896	0.273212	0.273505	0.273779	0.274034	0.274273	0.274497	0.274707	0.274905	0.275092	0.275268	0.275435	0.275593	0.275743	0.275886	0.276022	0.276151	0.276274	0.276392	0.276504	0.276611	0.276714
0.190909	0.0337107	0.0927587	0.14019	0.177025	0.204917	0.225732	0.241237	0.252908	0.261868	0.268914	0.274596	0.279111	0.28108	0.282838	0.284385	0.285742	0.286934	0.287985	0.288917	0.289748	0.290492	0.291163	0.291771	0.292324	0.292829	0.293292	0.293718	0.294112	0.294476	0.294814	0.295129	0.295424	0.295699	0.295957	0.2962	0.296428	0.296643	0.296846	0.297038	0.297221	0.297393	0.297558	0.297714	0.297863	0.298005	0.29814	0.29827	0.298393	0.298512
0.21101	0.0348365	0.0963217	0.14627	0.185507	0.215532	0.238133	0.255077	0.267886	0.277743	0.285507	0.291773	0.296946	0.299479	0.301479	0.303239	0.304781	0.306136	0.307329	0.308387	0.30933	0.310175	0.310937	0.311626	0.312253	0.312826	0.31335	0.313834	0.314279	0.314692	0.315076	0.315433	0.315767	0.316078	0.316371	0.316645	0.316904	0.317148	0.317378	0.317596	0.317802	0.317998	0.318184	0.318361	0.318529	0.31869	0.318844	0.31899	0.31913	0.319265
0.231111	0.0358407	0.0995298	0.151797	0.193285	0.225341	0.249667	0.268014	0.28194	0.292683	0.301157	0.308001	0.313654	0.31692	0.319163	0.321136	0.322865	0.324382	0.325719	0.326904	0.327959	0.328905	0.329757	0.330528	0.331229	0.331869	0.332456	0.332996	0.333495	0.333957	0.334386	0.334785	0.335157	0.335506	0.335833	0.33614	0.336429	0.336701	0.336958	0.337202	0.337432	0.337651	0.337859	0.338057	0.338245	0.338424	0.338596	0.33876	0.338916	0.339066
0.251212	0.0367421	0.102434	0.156841	0.200443	0.234435	0.260426	0.280141	0.295162	0.306779	0.315953	0.323368	0.329495	0.333489	0.335975	0.338162	0.340077	0.341758	0.343239	0.34455	0.345718	0.346765	0.347707	0.34856	0.349336	0.350044	0.350693	0.35129	0.351841	0.352352	0.352826	0.353267	0.353679	0.354064	0.354425	0.354765	0.355084	0.355385	0.355669	0.355938	0.356193	0.356435	0.356665	0.356883	0.357091	0.35729	0.357479	0.35766	0.357833	0.357999
0.271313	0.0375556	0.105075	0.161466	0.207055	0.242892	0.270489	0.291536	0.307632	0.320108	0.329973	0.337952	0.344548	0.349263	0.351993	0.354392	0.356494	0.358338	0.359962	0.361401	0.362682	0.363829	0.364862	0.365796	0.366646	0.367422	0.368133	0.368787	0.369391	0.36995	0.37047	0.370953	0.371404	0.371826	0.372221	0.372593	0.372943	0.373272	0.373584	0.373878	0.374157	0.374422	0.374673	0.374912	0.37514	0.375358	0.375565	0.375763	0.375953	0.376134
0.291414	0.0382936	0.107487	0.16572	0.21318	0.250778	0.279924	0.302269	0.319418	0.332738	0.343285	0.35182	0.358879	0.36431	0.367281	0.369893	0.372181	0.374188	0.375956	0.37752	0.378914	0.380161	0.381285	0.382301	0.383225	0.384068	0.384841	0.385552	0.386209	0.386816	0.387381	0.387906	0.388396	0.388854	0.389284	0.389688	0.390068	0.390426	0.390764	0.391084	0.391387	0.391675	0.391948	0.392208	0.392455	0.392691	0.392917	0.393132	0.393338	0.393535
0.311515	0.0389661	0.109699	0.169648	0.218872	0.25815	0.288792	0.312399	0.330579	0.344731	0.355948	0.365033	0.372548	0.378687	0.381899	0.384723	0.387196	0.389366	0.391276	0.392967	0.394472	0.39582	0.397033	0.398131	0.399128	0.400039	0.400874	0.401642	0.40235	0.403006	0.403615	0.404182	0.404711	0.405206	0.40567	0.406105	0.406515	0.406902	0.407267	0.407612	0.40794	0.40825	0.408545	0.408825	0.409092	0.409347	0.40959	0.409822	0.410044	0.410257
0.331616	0.0395815	0.111735	0.173285	0.224175	0.265058	0.297143	0.321979	0.341169	0.356137	0.368016	0.377642	0.385607	0.392326	0.395898	0.398933	0.401591	0.403922	0.405974	0.407791	0.409408	0.410855	0.412158	0.413337	0.414408	0.415385	0.416281	0.417106	0.417866	0.41857	0.419224	0.419832	0.4204	0.420931	0.421428	0.421896	0.422336	0.422751	0.423143	0.423513	0.423864	0.424197	0.424514	0.424814	0.425101	0.425374	0.425635	0.425884	0.426123	0.426351
0.351717	0.0401468	0.113616	0.176663	0.229128	0.271545	0.305024	0.331056	0.351235	0.367005	0.379535	0.389694	0.398103	0.405197	0.409325	0.412569	0.415411	0.417903	0.420096	0.422038	0.423766	0.425312	0.426704	0.427963	0.429107	0.430152	0.431109	0.431989	0.432801	0.433553	0.434251	0.434901	0.435507	0.436074	0.436605	0.437105	0.437574	0.438017	0.438435	0.438831	0.439206	0.439561	0.439899	0.44022	0.440526	0.440818	0.441096	0.441362	0.441617	0.44186
0.371818	0.0406678	0.115358	0.179809	0.233765	0.277651	0.312475	0.339671	0.360817	0.377376	0.390546	0.401231	0.410078	0.417543	0.422221	0.425673	0.428697	0.431349	0.433683	0.435749	0.437587	0.439232	0.440713	0.442052	0.443268	0.444379	0.445396	0.446332	0.447196	0.447995	0.448737	0.449428	0.450072	0.450675	0.45124	0.451771	0.45227	0.452741	0.453185	0.453606	0.454004	0.454382	0.454741	0.455083	0.455408	0.455718	0.456014	0.456296	0.456567	0.456826
0.391919	0.0411495	0.116975	0.182745	0.238116	0.283407	0.319531	0.347859	0.369953	0.387286	0.401088	0.41229	0.421569	0.429399	0.434622	0.438281	0.441486	0.444297	0.446771	0.44896	0.450908	0.452651	0.454219	0.455638	0.456927	0.458103	0.459181	0.460172	0.461086	0.461933	0.462718	0.46345	0.464132	0.464771	0.465369	0.465931	0.46646	0.466958	0.467429	0.467874	0.468296	0.468696	0.469076	0.469437	0.469782	0.47011	0.470423	0.470722	0.471009	0.471283
0.41202	0.0415964	0.118482	0.185492	0.242207	0.288843	0.326223	0.355655	0.378675	0.396769	0.411192	0.422905	0.432609	0.440799	0.446562	0.450427	0.453812	0.45678	0.459393	0.461705	0.463761	0.465602	0.467257	0.468755	0.470115	0.471357	0.472494	0.47354	0.474505	0.475399	0.476228	0.477	0.47772	0.478393	0.479025	0.479617	0.480175	0.480701	0.481198	0.481668	0.482113	0.482535	0.482936	0.483317	0.48368	0.484027	0.484357	0.484673	0.484975	0.485264
0.432121	0.0420119	0.119889	0.188069	0.24606	0.293987	0.332581	0.363086	0.387014	0.405856	0.42089	0.433106	0.443229	0.451774	0.458074	0.46214	0.465704	0.468829	0.471579	0.474013	0.476177	0.478114	0.479857	0.481432	0.482864	0.48417	0.485367	0.486467	0.487483	0.488422	0.489295	0.490107	0.490864	0.491573	0.492237	0.49286	0.493447	0.494	0.494523	0.495017	0.495485	0.495929	0.496351	0.496752	0.497134	0.497498	0.497846	0.498178	0.498496	0.4988
0.452222	0.0423993	0.121206	0.190489	0.249695	0.298861	0.33863	0.37018	0.394995	0.414572	0.430208	0.44292	0.453456	0.462352	0.469181	0.473449	0.477189	0.48047	0.483357	0.485911	0.488183	0.490216	0.492044	0.493698	0.4952	0.49657	0.497826	0.49898	0.500046	0.501031	0.501946	0.502798	0.503593	0.504336	0.505032	0.505686	0.506302	0.506882	0.50743	0.507948	0.508439	0.508905	0.509347	0.509768	0.510169	0.510551	0.510915	0.511264	0.511597	0.511916
0.472323	0.0427614	0.122441	0.192768	0.253131	0.303486	0.344391	0.37696	0.402645	0.422943	0.439171	0.452371	0.463315	0.472556	0.479909	0.484377	0.488293	0.491728	0.494751	0.497424	0.499803	0.501931	0.503845	0.505575	0.507147	0.508581	0.509895	0.511104	0.512218	0.51325	0.514207	0.515098	0.51593	0.516707	0.517436	0.51812	0.518764	0.519371	0.519945	0.520487	0.521	0.521487	0.52195	0.52239	0.52281	0.523209	0.523591	0.523955	0.524304	0.524637
0.492424	0.0431005	0.123601	0.194917	0.256384	0.307882	0.349886	0.383447	0.409983	0.43099	0.447802	0.461484	0.47283	0.482411	0.490281	0.494948	0.499038	0.502626	0.505783	0.508576	0.51106	0.513282	0.515281	0.517087	0.518729	0.520226	0.521598	0.52286	0.524023	0.5251	0.526099	0.52703	0.527898	0.528709	0.52947	0.530184	0.530856	0.53149	0.532088	0.532654	0.533191	0.533699	0.534182	0.534641	0.535079	0.535496	0.535894	0.536274	0.536638	0.536987
0.512525	0.0434188	0.124694	0.196947	0.259468	0.312065	0.355133	0.389661	0.417031	0.438735	0.456121	0.470277	0.482019	0.491936	0.500315	0.505182	0.509445	0.513184	0.516475	0.519386	0.521974	0.52429	0.526373	0.528255	0.529965	0.531526	0.532955	0.534269	0.535481	0.536603	0.537644	0.538613	0.539517	0.540363	0.541155	0.541899	0.542599	0.543259	0.543883	0.544472	0.54503	0.54556	0.546063	0.546542	0.546997	0.547432	0.547846	0.548243	0.548622	0.548984
0.532626	0.0437182	0.125724	0.198868	0.262396	0.31605	0.36015	0.395619	0.423806	0.446194	0.464146	0.47877	0.490904	0.501151	0.509946	0.515098	0.519533	0.523422	0.526845	0.529873	0.532565	0.534974	0.53714	0.539098	0.540876	0.542498	0.543985	0.545351	0.546611	0.547778	0.54886	0.549867	0.550807	0.551686	0.55251	0.553284	0.554012	0.554698	0.555346	0.555959	0.556539	0.55709	0.557613	0.55811	0.558584	0.559035	0.559466	0.559878	0.560272	0.560649
0.552727	0.0440002	0.126697	0.200688	0.26518	0.319851	0.364951	0.401339	0.430326	0.453387	0.471895	0.486981	0.4995	0.510074	0.51915	0.524714	0.529319	0.533357	0.536911	0.540055	0.542851	0.545351	0.5476	0.549632	0.551478	0.553162	0.554705	0.556123	0.557431	0.558641	0.559765	0.56081	0.561786	0.562698	0.563553	0.564356	0.565111	0.565823	0.566496	0.567132	0.567734	0.568305	0.568848	0.569364	0.569856	0.570324	0.570772	0.571199	0.571608	0.571999
0.572828	0.0442664	0.127618	0.202416	0.26783	0.323481	0.369551	0.406834	0.436604	0.460327	0.479384	0.494924	0.507824	0.51872	0.528073	0.534049	0.538819	0.543005	0.54669	0.549948	0.552846	0.555438	0.557768	0.559875	0.561788	0.563533	0.565131	0.566601	0.567956	0.56921	0.570375	0.571458	0.572469	0.573414	0.574299	0.575131	0.575914	0.576652	0.577348	0.578007	0.578631	0.579223	0.579785	0.58032	0.580829	0.581315	0.581778	0.582221	0.582645	0.58305
0.592929	0.044518	0.128491	0.204057	0.270355	0.326952	0.373961	0.412118	0.442656	0.467029	0.486627	0.502616	0.51589	0.527105	0.536731	0.543112	0.548049	0.552382	0.556195	0.559567	0.562566	0.565249	0.56766	0.56984	0.57182	0.573625	0.575279	0.5768	0.578202	0.5795	0.580704	0.581825	0.58287	0.583848	0.584764	0.585625	0.586435	0.587198	0.587919	0.5886	0.589246	0.589858	0.59044	0.590993	0.59152	0.592022	0.592501	0.592959	0.593397	0.593817
0.61303	0.0447563	0.129319	0.205618	0.272765	0.330274	0.378195	0.417204	0.448495	0.473506	0.493637	0.510068	0.523713	0.535242	0.545138	0.55192	0.557022	0.5615	0.565441	0.568927	0.572026	0.574798	0.57729	0.579542	0.581588	0.583453	0.585162	0.586733	0.588182	0.589523	0.590767	0.591925	0.593005	0.594015	0.594962	0.595851	0.596687	0.597476	0.59822	0.598924	0.599591	0.600224	0.600825	0.601396	0.60194	0.602459	0.602954	0.603428	0.60388	0.604313
0.633131	0.0449822	0.130106	0.207106	0.275066	0.333455	0.382262	0.422102	0.454131	0.479772	0.500427	0.517294	0.531304	0.543143	0.553305	0.560486	0.565751	0.570372	0.574441	0.578038	0.581237	0.584098	0.58667	0.588994	0.591105	0.59303	0.594794	0.596414	0.597909	0.599293	0.600577	0.601771	0.602886	0.603928	0.604905	0.605822	0.606685	0.607498	0.608266	0.608993	0.609681	0.610333	0.610953	0.611543	0.612104	0.61264	0.613151	0.613638	0.614105	0.614552
0.653232	0.0451966	0.130855	0.208524	0.277267	0.336506	0.386172	0.426824	0.459576	0.485835	0.507008	0.524306	0.538677	0.550821	0.561246	0.56882	0.574247	0.579012	0.583206	0.586914	0.590212	0.59316	0.595812	0.598208	0.600383	0.602367	0.604185	0.605855	0.607396	0.608822	0.610145	0.611376	0.612524	0.613598	0.614605	0.61555	0.616439	0.617277	0.618069	0.618817	0.619526	0.620199	0.620838	0.621445	0.622024	0.622575	0.623101	0.623605	0.624085	0.624546
0.673333	0.0454005	0.131568	0.209879	0.279373	0.339434	0.389935	0.43138	0.464841	0.491708	0.513391	0.531113	0.54584	0.558287	0.568972	0.576936	0.582522	0.587429	0.591747	0.595566	0.598961	0.601997	0.604727	0.607194	0.609433	0.611476	0.613347	0.615067	0.616653	0.61812	0.619482	0.62075	0.621932	0.623037	0.624073	0.625046	0.625961	0.626824	0.627639	0.628409	0.629139	0.629831	0.630489	0.631114	0.631709	0.632277	0.632819	0.633336	0.633832	0.634306
0.693434	0.0455946	0.132249	0.211173	0.281391	0.342246	0.393559	0.435778	0.469935	0.4974	0.519585	0.537727	0.552805	0.56555	0.576491	0.584841	0.590587	0.595633	0.600075	0.604003	0.607496	0.610618	0.613426	0.615963	0.618266	0.620367	0.622291	0.624059	0.62569	0.627199	0.6286	0.629903	0.631119	0.632255	0.63332	0.634321	0.635262	0.636149	0.636987	0.637779	0.638529	0.639241	0.639917	0.64056	0.641172	0.641756	0.642313	0.642845	0.643354	0.643841
0.713535	0.0457796	0.132898	0.212411	0.283326	0.344949	0.397051	0.440027	0.474865	0.50292	0.5256	0.544156	0.559581	0.57262	0.583815	0.592547	0.598453	0.603635	0.6082	0.612236	0.615825	0.619034	0.621918	0.624525	0.626891	0.62905	0.631026	0.632843	0.634518	0.636068	0.637507	0.638846	0.640094	0.641262	0.642356	0.643384	0.644351	0.645262	0.646122	0.646936	0.647707	0.648438	0.649132	0.649792	0.650421	0.651021	0.651593	0.652139	0.652662	0.653163
0.733636	0.0459561	0.133519	0.213597	0.285183	0.34755	0.400419	0.444134	0.479642	0.508275	0.531444	0.550408	0.566176	0.579507	0.590952	0.600062	0.606124	0.611444	0.61613	0.620274	0.623958	0.627252	0.630212	0.632888	0.635317	0.637532	0.639561	0.641426	0.643145	0.644736	0.646213	0.647587	0.648868	0.650067	0.65119	0.652244	0.653236	0.654171	0.655054	0.655889	0.65668	0.657431	0.658143	0.658821	0.659466	0.660081	0.660668	0.66123	0.661766	0.66228
0.753737	0.0461247	0.134112	0.214734	0.286967	0.350054	0.40367	0.448106	0.484271	0.513475	0.537126	0.556493	0.5726	0.586218	0.59791	0.607393	0.613612	0.619067	0.623874	0.628124	0.631903	0.635281	0.638318	0.641062	0.643553	0.645825	0.647905	0.649817	0.651581	0.653212	0.654726	0.656135	0.657449	0.658678	0.659829	0.66091	0.661928	0.662887	0.663792	0.664648	0.665459	0.666228	0.666959	0.667654	0.668315	0.668946	0.669548	0.670123	0.670674	0.6712
0.773838	0.0462859	0.134681	0.215824	0.288681	0.352466	0.406809	0.451951	0.488761	0.518526	0.542652	0.562417	0.578859	0.592761	0.604697	0.61455	0.620924	0.626514	0.631439	0.635795	0.639668	0.64313	0.646242	0.649053	0.651606	0.653934	0.656066	0.658025	0.659832	0.661503	0.663054	0.664498	0.665844	0.667103	0.668283	0.66939	0.670433	0.671415	0.672343	0.67322	0.674051	0.674839	0.675587	0.676299	0.676977	0.677623	0.67824	0.678829	0.679393	0.679932
0.793939	0.0464401	0.135226	0.216871	0.290331	0.354792	0.409842	0.455675	0.493118	0.523436	0.54803	0.568188	0.58496	0.599143	0.611321	0.621537	0.628067	0.633794	0.638834	0.643295	0.64726	0.650806	0.653992	0.656871	0.659485	0.661868	0.66405	0.666056	0.667906	0.669617	0.671206	0.672683	0.674062	0.67535	0.676558	0.677692	0.678759	0.679765	0.680714	0.681612	0.682463	0.683269	0.684036	0.684764	0.685458	0.68612	0.686753	0.687356	0.687933	0.688486
0.81404	0.0465879	0.135749	0.217877	0.291919	0.357036	0.412776	0.459284	0.497347	0.528209	0.553266	0.573812	0.590911	0.605371	0.617788	0.628361	0.635048	0.640908	0.646065	0.65063	0.654688	0.658315	0.661575	0.664521	0.667195	0.669634	0.671867	0.673919	0.675811	0.677562	0.679187	0.680698	0.682108	0.683427	0.684662	0.685822	0.686914	0.687943	0.688914	0.689832	0.690705	0.69153	0.692314	0.693059	0.693769	0.694446	0.695091	0.695709	0.696299	0.696864
0.834141	0.0467296	0.136251	0.218845	0.29345	0.359203	0.415613	0.462782	0.501456	0.532853	0.558367	0.579296	0.596718	0.611452	0.624105	0.635041	0.641874	0.647866	0.653139	0.657806	0.661956	0.665665	0.668999	0.67201	0.674745	0.677238	0.67952	0.681618	0.683553	0.685343	0.687004	0.688549	0.689991	0.691339	0.692602	0.69379	0.694906	0.695958	0.696951	0.69789	0.698779	0.699623	0.700424	0.701186	0.701912	0.702603	0.703264	0.703894	0.704498	0.705075
0.854242	0.0468656	0.136734	0.219776	0.294925	0.361296	0.41836	0.466175	0.505448	0.537374	0.563337	0.584646	0.602386	0.617392	0.630278	0.641492	0.648552	0.654674	0.660066	0.664831	0.669071	0.672861	0.676268	0.679345	0.682139	0.684686	0.687019	0.689162	0.691139	0.692967	0.694664	0.696246	0.697719	0.699095	0.700386	0.701597	0.702737	0.703812	0.704826	0.705785	0.706694	0.707556	0.708374	0.709153	0.709894	0.710601	0.711275	0.71192	0.712536	0.713126
0.874343	0.0469962	0.137198	0.220673	0.296349	0.363319	0.421021	0.469469	0.50933	0.541775	0.568183	0.589866	0.607922	0.623196	0.636313	0.647727	0.655086	0.661338	0.666844	0.671714	0.67604	0.67991	0.683389	0.686531	0.689384	0.691985	0.694367	0.696558	0.698577	0.700444	0.702176	0.703788	0.705292	0.706698	0.708015	0.709252	0.710416	0.711513	0.712549	0.713528	0.714456	0.715336	0.716171	0.716966	0.717723	0.718444	0.719133	0.719791	0.72042	0.721022
0.894444	0.0471217	0.137644	0.221537	0.297723	0.365275	0.423599	0.472666	0.513105	0.546063	0.57291	0.594963	0.61333	0.62887	0.642215	0.653828	0.661483	0.667863	0.673482	0.678453	0.682872	0.686821	0.690372	0.693578	0.69649	0.699144	0.701574	0.703807	0.705867	0.707772	0.70954	0.711185	0.712719	0.714154	0.715498	0.71676	0.717948	0.719067	0.720124	0.721123	0.72207	0.722967	0.72382	0.724631	0.725403	0.726139	0.726842	0.727513	0.728155	0.72877
0.914546	0.0472425	0.138074	0.222371	0.29905	0.367169	0.426099	0.475772	0.51678	0.550242	0.577522	0.599941	0.618617	0.634418	0.647989	0.659799	0.667747	0.674254	0.679986	0.685056	0.689564	0.693593	0.697213	0.700484	0.703454	0.706161	0.708639	0.710917	0.713017	0.714961	0.716763	0.718441	0.720006	0.721469	0.722839	0.724127	0.725338	0.726479	0.727557	0.728576	0.729541	0.730456	0.731326	0.732153	0.73294	0.733691	0.734408	0.735092	0.735747	0.736374
0.934647	0.0473587	0.138489	0.223176	0.300333	0.369002	0.428524	0.478791	0.520357	0.554317	0.582024	0.604804	0.623785	0.639846	0.65364	0.665644	0.673884	0.680517	0.686361	0.691529	0.696125	0.700232	0.703923	0.707258	0.710284	0.713044	0.71557	0.717892	0.720033	0.722014	0.723851	0.725561	0.727156	0.728647	0.730044	0.731356	0.732591	0.733754	0.734853	0.735891	0.736875	0.737808	0.738694	0.739537	0.74034	0.741105	0.741835	0.742533	0.7432	0.743839
0.954747	0.0474707	0.138888	0.223953	0.301574	0.370778	0.430878	0.481727	0.523841	0.558291	0.586421	0.609558	0.62884	0.645158	0.659173	0.67137	0.679898	0.686656	0.69261	0.697877	0.702559	0.706744	0.710505	0.713903	0.716987	0.719798	0.722372	0.724738	0.726919	0.728937	0.730809	0.732551	0.734176	0.735695	0.737118	0.738455	0.739712	0.740897	0.742016	0.743074	0.744077	0.745027	0.74593	0.746789	0.747606	0.748386	0.74913	0.74984	0.75052	0.751171
0.974849	0.0475787	0.139274	0.224703	0.302774	0.372499	0.433163	0.484582	0.527236	0.562169	0.590715	0.614206	0.633786	0.650358	0.664592	0.676979	0.685793	0.692676	0.698739	0.704103	0.708872	0.713134	0.716965	0.720424	0.723565	0.726428	0.729049	0.731458	0.733679	0.735734	0.737641	0.739414	0.741069	0.742615	0.744065	0.745426	0.746706	0.747913	0.749052	0.75013	0.75115	0.752118	0.753037	0.753912	0.754744	0.755538	0.756295	0.757019	0.757711	0.758374
0.99495	0.0476829	0.139647	0.225429	0.303936	0.374168	0.435383	0.48736	0.530545	0.565954	0.594912	0.618752	0.638628	0.65545	0.6699	0.682476	0.691574	0.69858	0.704752	0.710213	0.715067	0.719406	0.723305	0.726827	0.730023	0.732938	0.735606	0.738058	0.740318	0.74241	0.74435	0.746155	0.747839	0.749414	0.750889	0.752274	0.753577	0.754805	0.755965	0.757061	0.7581	0.759085	0.760021	0.760911	0.761758	0.762565	0.763336	0.764073	0.764777	0.765451
1.01505	0.0477834	0.140007	0.226131	0.305062	0.375787	0.43754	0.490065	0.533771	0.56965	0.599015	0.6232	0.643368	0.660439	0.675103	0.687866	0.697245	0.704373	0.710653	0.716209	0.721148	0.725563	0.72953	0.733114	0.736366	0.739331	0.742046	0.74454	0.74684	0.748968	0.750942	0.752779	0.754492	0.756093	0.757594	0.759003	0.760329	0.761579	0.762758	0.763874	0.76493	0.765932	0.766884	0.767789	0.768651	0.769473	0.770257	0.771006	0.771723	0.772409
1.03515	0.0478805	0.140355	0.22681	0.306154	0.377359	0.439638	0.4927	0.536918	0.57326	0.603027	0.627553	0.64801	0.665327	0.680204	0.693151	0.702809	0.710058	0.716445	0.722096	0.72712	0.73161	0.735645	0.739289	0.742597	0.745613	0.748373	0.75091	0.753249	0.755413	0.75742	0.759288	0.76103	0.762659	0.764185	0.765618	0.766966	0.768236	0.769436	0.770571	0.771645	0.772664	0.773632	0.774552	0.775429	0.776264	0.777062	0.777824	0.778552	0.77925
1.05525	0.0479744	0.140691	0.227468	0.307212	0.378885	0.441678	0.495266	0.539989	0.576788	0.606951	0.631815	0.652558	0.670119	0.685206	0.698336	0.70827	0.715639	0.722133	0.727878	0.732985	0.73755	0.741652	0.745357	0.74872	0.751786	0.754592	0.75717	0.759548	0.761748	0.763788	0.765687	0.767458	0.769113	0.770665	0.772121	0.773491	0.774783	0.776002	0.777155	0.778247	0.779283	0.780267	0.781203	0.782094	0.782943	0.783753	0.784528	0.785269	0.785977
1.07535	0.0480651	0.141017	0.228106	0.308238	0.380368	0.443662	0.497767	0.542986	0.580236	0.610791	0.63599	0.657016	0.674818	0.690112	0.703423	0.713631	0.72112	0.727719	0.733557	0.738748	0.743387	0.747556	0.751321	0.754738	0.757853	0.760705	0.763325	0.765741	0.767976	0.77005	0.771979	0.773778	0.775461	0.777037	0.778517	0.779909	0.781222	0.782461	0.783632	0.784742	0.785794	0.786794	0.787744	0.78865	0.789513	0.790336	0.791123	0.791875	0.792596
1.09546	0.0481529	0.141332	0.228724	0.309234	0.381809	0.445594	0.500205	0.545913	0.583607	0.61455	0.640079	0.661385	0.679426	0.694926	0.708417	0.718896	0.726503	0.733207	0.739138	0.744411	0.749124	0.753359	0.757184	0.760655	0.763819	0.766716	0.769378	0.771832	0.774102	0.776208	0.778168	0.779995	0.781704	0.783305	0.784808	0.786223	0.787555	0.788814	0.790004	0.791131	0.7922	0.793215	0.794181	0.7951	0.795977	0.796813	0.797612	0.798377	0.799108
1.11556	0.0482379	0.141638	0.229323	0.310201	0.38321	0.447476	0.502583	0.548772	0.586904	0.61823	0.644086	0.66567	0.683947	0.69965	0.713319	0.724067	0.731792	0.7386	0.744623	0.749978	0.754764	0.759064	0.762948	0.766473	0.769687	0.772628	0.775331	0.777823	0.780128	0.782266	0.784256	0.786112	0.787847	0.789472	0.790999	0.792435	0.793788	0.795066	0.796274	0.797418	0.798504	0.799535	0.800515	0.801449	0.802338	0.803188	0.803999	0.804775	0.805518
1.13566	0.0483202	0.141934	0.229905	0.311141	0.384573	0.449308	0.504904	0.551565	0.590129	0.621834	0.648014	0.669872	0.688383	0.704289	0.718133	0.729148	0.73699	0.743901	0.750015	0.755452	0.76031	0.764676	0.768618	0.772197	0.775458	0.778444	0.781188	0.783717	0.786057	0.788228	0.790247	0.792131	0.793892	0.795542	0.797091	0.798549	0.799922	0.801219	0.802446	0.803607	0.804709	0.805755	0.80675	0.807698	0.808601	0.809463	0.810287	0.811074	0.811828
1.15576	0.0484	0.142222	0.230469	0.312053	0.385899	0.451094	0.507168	0.554294	0.593286	0.625365	0.651865	0.673995	0.692738	0.708843	0.722862	0.734141	0.7421	0.749113	0.755318	0.760835	0.765765	0.770196	0.774197	0.777828	0.781138	0.784167	0.786951	0.789518	0.791892	0.794095	0.796144	0.798056	0.799842	0.801517	0.803089	0.804568	0.805961	0.807277	0.808522	0.8097	0.810818	0.81188	0.812889	0.813851	0.814767	0.815642	0.816477	0.817277	0.818042
1.17586	0.0484774	0.142501	0.231017	0.312941	0.387189	0.452835	0.509378	0.556963	0.596375	0.628825	0.655642	0.678041	0.697014	0.713317	0.727509	0.739049	0.747124	0.754238	0.760533	0.76613	0.771132	0.775627	0.779686	0.783369	0.786727	0.789801	0.792624	0.795228	0.797637	0.799871	0.80195	0.803889	0.805701	0.807399	0.808994	0.810494	0.811908	0.813243	0.814505	0.8157	0.816834	0.817911	0.818935	0.81991	0.82084	0.821727	0.822575	0.823385	0.824161
1.19596	0.0485524	0.142771	0.23155	0.313804	0.388446	0.454532	0.511537	0.559573	0.599401	0.632216	0.659347	0.682013	0.701213	0.717712	0.732075	0.743874	0.752065	0.75928	0.765664	0.77134	0.776413	0.780972	0.785088	0.788824	0.792229	0.795346	0.79821	0.80085	0.803293	0.805558	0.807666	0.809632	0.81147	0.813193	0.81481	0.816331	0.817764	0.819118	0.820398	0.82161	0.82276	0.823852	0.82489	0.825879	0.826822	0.827721	0.828581	0.829403	0.83019
1.21606	0.0486252	0.143034	0.232067	0.314644	0.38967	0.456188	0.513645	0.562125	0.602364	0.635541	0.662982	0.685912	0.705338	0.722031	0.736564	0.748619	0.756925	0.76424	0.770713	0.776468	0.781612	0.786233	0.790407	0.794194	0.797647	0.800806	0.80371	0.806387	0.808863	0.81116	0.813297	0.81529	0.817153	0.818899	0.820538	0.82208	0.823534	0.824906	0.826203	0.827432	0.828598	0.829705	0.830758	0.83176	0.832716	0.833627	0.834499	0.835332	0.83613
1.23616	0.0486959	0.143289	0.232571	0.315461	0.390863	0.457803	0.515705	0.564623	0.605266	0.638801	0.66655	0.689742	0.709391	0.726277	0.740977	0.753286	0.761707	0.769121	0.775682	0.781516	0.786729	0.791413	0.795644	0.799482	0.802982	0.806184	0.809127	0.81184	0.814349	0.816678	0.818843	0.820863	0.822752	0.824521	0.826183	0.827745	0.829218	0.830609	0.831924	0.833169	0.83435	0.835472	0.836539	0.837555	0.838523	0.839448	0.840331	0.841175	0.841984
1.25626	0.0487645	0.143537	0.23306	0.316257	0.392026	0.45938	0.517719	0.567068	0.60811	0.641999	0.670052	0.693503	0.713374	0.73045	0.745317	0.757876	0.766413	0.773926	0.780574	0.786485	0.791768	0.796515	0.800802	0.804691	0.808237	0.811482	0.814464	0.817213	0.819755	0.822114	0.824309	0.826355	0.828269	0.830061	0.831745	0.833328	0.83482	0.836229	0.837562	0.838824	0.84002	0.841157	0.842238	0.843267	0.844248	0.845185	0.846079	0.846935	0.847754
1.27636	0.0488312	0.143779	0.233537	0.317032	0.39316	0.460919	0.519687	0.569461	0.610898	0.645137	0.673491	0.697199	0.717289	0.734555	0.749587	0.762391	0.771046	0.778655	0.785391	0.791379	0.796731	0.80154	0.805882	0.809823	0.813414	0.816702	0.819722	0.822507	0.825082	0.827472	0.829695	0.831768	0.833706	0.835522	0.837227	0.838831	0.840342	0.841769	0.843119	0.844397	0.845609	0.846761	0.847856	0.848898	0.849892	0.85084	0.851747	0.852613	0.853443
1.29646	0.0488961	0.144013	0.234	0.317787	0.394266	0.462423	0.521613	0.571804	0.613631	0.648216	0.676869	0.700831	0.721138	0.738591	0.753787	0.766861	0.775606	0.783313	0.790134	0.7962	0.80162	0.80649	0.810888	0.814879	0.818516	0.821846	0.824904	0.827724	0.830333	0.832753	0.835004	0.837103	0.839066	0.840905	0.842631	0.844256	0.845786	0.847232	0.848598	0.849893	0.85112	0.852286	0.853395	0.85445	0.855457	0.856417	0.857335	0.858213	0.859053
1.31657	0.0489591	0.144242	0.234452	0.318523	0.395345	0.463891	0.523496	0.574099	0.616311	0.651239	0.680187	0.704401	0.724924	0.742563	0.75792	0.77124	0.780097	0.7879	0.794807	0.800948	0.806437	0.811368	0.815821	0.819862	0.823545	0.826916	0.830013	0.832868	0.835509	0.837959	0.840238	0.842363	0.84435	0.846212	0.84796	0.849605	0.851154	0.852618	0.854001	0.855312	0.856554	0.857735	0.858857	0.859926	0.860945	0.861917	0.862846	0.863735	0.864586
1.33667	0.0490205	0.144464	0.234892	0.319241	0.396398	0.465326	0.525338	0.576347	0.61894	0.654206	0.683447	0.707911	0.728647	0.74647	0.761989	0.775548	0.78452	0.792419	0.799411	0.805628	0.811184	0.816176	0.820683	0.824774	0.828502	0.831914	0.835049	0.837939	0.840612	0.843092	0.845399	0.84755	0.849562	0.851446	0.853216	0.85488	0.856449	0.85793	0.85933	0.860656	0.861914	0.863109	0.864245	0.865327	0.866358	0.867343	0.868283	0.869182	0.870043
1.35677	0.0490802	0.14468	0.23532	0.319941	0.397426	0.466729	0.527141	0.578551	0.621518	0.65712	0.686651	0.711363	0.73231	0.750316	0.765994	0.779776	0.788877	0.796871	0.803947	0.810239	0.815863	0.820914	0.825477	0.829616	0.833389	0.836842	0.840015	0.842939	0.845645	0.848154	0.850489	0.852666	0.854702	0.856608	0.858399	0.860084	0.861671	0.86317	0.864587	0.865929	0.867202	0.868411	0.869561	0.870656	0.871699	0.872695	0.873647	0.874557	0.875428
1.37687	0.0491383	0.144891	0.235738	0.320624	0.39843	0.4681	0.528906	0.58071	0.624049	0.659982	0.6898	0.714757	0.735915	0.754101	0.769937	0.783878	0.79317	0.801258	0.808418	0.814785	0.820475	0.825587	0.830203	0.834391	0.838209	0.841702	0.844912	0.847872	0.850609	0.853148	0.85551	0.857712	0.859772	0.861701	0.863513	0.865217	0.866823	0.868339	0.869773	0.871131	0.872419	0.873642	0.874805	0.875913	0.876969	0.877977	0.878939	0.87986	0.880741
1.39697	0.0491949	0.145096	0.236145	0.32129	0.399411	0.469441	0.530634	0.582827	0.626532	0.662793	0.692896	0.718097	0.739462	0.757828	0.773821	0.7879	0.7974	0.805582	0.812825	0.819266	0.825022	0.830194	0.834863	0.8391	0.842962	0.846496	0.849743	0.852737	0.855506	0.858074	0.860463	0.862691	0.864775	0.866726	0.868559	0.870282	0.871907	0.873441	0.874891	0.876265	0.877567	0.878805	0.879981	0.881101	0.88217	0.883189	0.884163	0.885094	0.885985
1.41707	0.04925	0.145297	0.236543	0.32194	0.400369	0.470753	0.532327	0.584903	0.62897	0.665556	0.695941	0.721383	0.742954	0.761498	0.777646	0.791863	0.80157	0.809844	0.81717	0.823685	0.829507	0.834737	0.83946	0.843745	0.847651	0.851226	0.85451	0.857537	0.860337	0.862935	0.865351	0.867604	0.869711	0.871685	0.873538	0.875281	0.876924	0.878475	0.879942	0.881331	0.882649	0.8839	0.88509	0.886223	0.887303	0.888334	0.889319	0.89026	0.891162
1.43717	0.0493038	0.145492	0.23693	0.322576	0.401306	0.472037	0.533985	0.586939	0.631363	0.668271	0.698935	0.724616	0.746392	0.765113	0.781415	0.795767	0.80568	0.814047	0.821455	0.828042	0.83393	0.839219	0.843995	0.848328	0.852278	0.855892	0.859212	0.862274	0.865105	0.867731	0.870175	0.872453	0.874583	0.876579	0.878453	0.880216	0.881877	0.883445	0.884928	0.886332	0.887665	0.88893	0.890133	0.891278	0.89237	0.893413	0.894408	0.895361	0.896272
1.45727	0.0493561	0.145682	0.237309	0.323196	0.402221	0.473293	0.53561	0.588936	0.633714	0.67094	0.701881	0.727799	0.749778	0.768673	0.785128	0.799616	0.809732	0.818191	0.825681	0.832341	0.838293	0.84364	0.848469	0.85285	0.856843	0.860497	0.863854	0.866949	0.869811	0.872466	0.874936	0.877239	0.879393	0.88141	0.883305	0.885086	0.886766	0.888351	0.88985	0.89127	0.892617	0.893896	0.895112	0.89627	0.897374	0.898428	0.899434	0.900397	0.901318
1.47737	0.0494072	0.145868	0.237678	0.323802	0.403117	0.474522	0.537202	0.590896	0.636023	0.673563	0.704779	0.730932	0.753112	0.772181	0.788788	0.803409	0.813728	0.822278	0.829849	0.836581	0.842598	0.848003	0.852884	0.857312	0.861348	0.865042	0.868435	0.871563	0.874456	0.87714	0.879636	0.881965	0.884141	0.88618	0.888095	0.889896	0.891593	0.893196	0.894711	0.896146	0.897507	0.898799	0.900029	0.901199	0.902315	0.90338	0.904397	0.90537	0.906302
1.49747	0.0494571	0.14605	0.238039	0.324394	0.403992	0.475726	0.538762	0.592819	0.638291	0.676143	0.707631	0.734016	0.756396	0.775638	0.792395	0.807149	0.817669	0.82631	0.833961	0.840765	0.846846	0.852309	0.857241	0.861717	0.865795	0.869528	0.872957	0.876118	0.879042	0.881754	0.884277	0.88663	0.888829	0.89089	0.892825	0.894645	0.89636	0.89798	0.899511	0.900961	0.902336	0.903642	0.904885	0.906068	0.907195	0.908271	0.909299	0.910282	0.911224
1.51758	0.0495057	0.146227	0.238391	0.324973	0.404849	0.476905	0.540292	0.594706	0.64052	0.678681	0.710437	0.737054	0.759632	0.779044	0.795951	0.810837	0.821557	0.830288	0.838018	0.844894	0.851038	0.856558	0.861543	0.866065	0.870186	0.873958	0.877422	0.880616	0.883571	0.886311	0.88886	0.891237	0.893459	0.895541	0.897496	0.899335	0.901068	0.902704	0.904251	0.905717	0.907106	0.908426	0.909681	0.910876	0.912015	0.913103	0.914141	0.915135	0.916086
1.53768	0.0495532	0.1464	0.238736	0.325539	0.405688	0.47806	0.541793	0.596559	0.64271	0.681176	0.7132	0.740046	0.762821	0.782402	0.799457	0.814474	0.825392	0.834212	0.842023	0.848969	0.855177	0.860753	0.865789	0.870357	0.874521	0.878331	0.881831	0.885058	0.888042	0.890811	0.893386	0.895787	0.898033	0.900136	0.902111	0.903968	0.905719	0.907372	0.908935	0.910415	0.911818	0.913152	0.91442	0.915627	0.916778	0.917876	0.918925	0.919929	0.920889
1.55778	0.0495995	0.146568	0.239072	0.326093	0.406508	0.479192	0.543265	0.598379	0.644863	0.683632	0.71592	0.742994	0.765963	0.785713	0.802914	0.818061	0.829176	0.838086	0.845975	0.852991	0.859262	0.864895	0.869982	0.874596	0.878802	0.882651	0.886186	0.889445	0.89246	0.895256	0.897857	0.900282	0.90255	0.904674	0.906669	0.908545	0.910313	0.911983	0.913561	0.915056	0.916474	0.917821	0.919101	0.92032	0.921483	0.922592	0.923652	0.924666	0.925636
1.57788	0.0496448	0.146733	0.239401	0.326634	0.407312	0.480301	0.544708	0.600166	0.646979	0.686048	0.718599	0.745898	0.76906	0.788977	0.806324	0.8216	0.83291	0.841908	0.849876	0.856962	0.863296	0.868985	0.874122	0.878783	0.88303	0.886917	0.890487	0.893779	0.896823	0.899647	0.902273	0.904723	0.907013	0.909158	0.911173	0.913067	0.914853	0.916539	0.918133	0.919643	0.921075	0.922434	0.923728	0.924959	0.926133	0.927253	0.928323	0.929347	0.930326
1.59798	0.049689	0.146895	0.239723	0.327164	0.408099	0.481388	0.546125	0.601921	0.64906	0.688426	0.721237	0.74876	0.772114	0.792196	0.809687	0.825091	0.836596	0.845682	0.853728	0.860883	0.867279	0.873024	0.878211	0.882917	0.887206	0.891131	0.894736	0.89806	0.901134	0.903985	0.906637	0.909111	0.911423	0.913589	0.915623	0.917536	0.919339	0.921041	0.922651	0.924175	0.925621	0.926994	0.9283	0.929543	0.930728	0.931859	0.93294	0.933973	0.934963
1.61808	0.0497322	0.147052	0.240037	0.327683	0.408869	0.482453	0.547515	0.603645	0.651107	0.690766	0.723835	0.75158	0.775124	0.795371	0.813006	0.828536	0.840235	0.849408	0.857531	0.864756	0.871213	0.877013	0.882251	0.887002	0.891332	0.895294	0.898934	0.90229	0.905393	0.908272	0.910949	0.913447	0.915781	0.917968	0.920021	0.921952	0.923773	0.925491	0.927116	0.928655	0.930114	0.931501	0.932819	0.934074	0.93527	0.936412	0.937503	0.938547	0.939545
1.63818	0.0497744	0.147207	0.240345	0.328191	0.409625	0.483498	0.54888	0.60534	0.65312	0.69307	0.726395	0.75436	0.778093	0.798503	0.81628	0.831936	0.843826	0.853087	0.861286	0.86858	0.875098	0.880954	0.886241	0.891037	0.895409	0.899408	0.903083	0.90647	0.909602	0.912508	0.915211	0.917732	0.920088	0.922296	0.924368	0.926318	0.928155	0.92989	0.93153	0.933083	0.934557	0.935956	0.937286	0.938553	0.939761	0.940913	0.942015	0.943068	0.944076
1.65828	0.0498157	0.147357	0.240646	0.328688	0.410364	0.484523	0.55022	0.607005	0.6551	0.695339	0.728917	0.7571	0.781021	0.801593	0.819511	0.835292	0.847373	0.85672	0.864996	0.872358	0.878937	0.884847	0.890184	0.895025	0.899437	0.903474	0.907183	0.910601	0.913763	0.916695	0.919423	0.921967	0.924346	0.926574	0.928665	0.930633	0.932488	0.934238	0.935894	0.937461	0.938948	0.94036	0.941703	0.942982	0.944201	0.945364	0.946475	0.947538	0.948555
1.67838	0.0498561	0.147505	0.240941	0.329175	0.411089	0.485528	0.551535	0.608642	0.657049	0.697573	0.731402	0.759803	0.783909	0.804641	0.8227	0.838605	0.850875	0.860308	0.86866	0.876089	0.882729	0.888694	0.89408	0.898965	0.903418	0.907492	0.911234	0.914685	0.917875	0.920835	0.923587	0.926155	0.928554	0.930803	0.932914	0.934899	0.936771	0.938537	0.940208	0.94179	0.94329	0.944715	0.94607	0.947361	0.948591	0.949765	0.950886	0.951959	0.952985
1.69849	0.0498956	0.147649	0.24123	0.329652	0.4118	0.486515	0.552827	0.610251	0.658966	0.699773	0.733852	0.762467	0.786758	0.80765	0.825848	0.841876	0.854334	0.863852	0.87228	0.879777	0.886477	0.892496	0.89793	0.90286	0.907353	0.911464	0.91524	0.918721	0.92194	0.924927	0.927704	0.930295	0.932716	0.934984	0.937114	0.939118	0.941006	0.942789	0.944474	0.94607	0.947584	0.949022	0.950389	0.951691	0.952932	0.954116	0.955248	0.95633	0.957366
1.71859	0.0499342	0.14779	0.241512	0.330119	0.412497	0.487483	0.554096	0.611833	0.660853	0.70194	0.736266	0.765095	0.78957	0.810619	0.828956	0.845106	0.85775	0.867354	0.875857	0.88342	0.89018	0.896253	0.901736	0.90671	0.911242	0.91539	0.9192	0.922712	0.92596	0.928972	0.931775	0.934388	0.936831	0.93912	0.941268	0.94329	0.945194	0.946993	0.948693	0.950303	0.951831	0.953281	0.954661	0.955974	0.957226	0.958421	0.959562	0.960654	0.961699
1.73869	0.049972	0.147929	0.241789	0.330577	0.413181	0.488433	0.555343	0.613389	0.662711	0.704075	0.738646	0.767687	0.792343	0.81355	0.832024	0.848296	0.861125	0.870813	0.879391	0.887021	0.893841	0.899967	0.905498	0.910516	0.915088	0.919272	0.923115	0.926658	0.929934	0.932973	0.9358	0.938436	0.9409	0.943209	0.945376	0.947415	0.949337	0.951151	0.952866	0.95449	0.956031	0.957494	0.958885	0.96021	0.961473	0.962678	0.96383	0.964931	0.965985
1.75879	0.0500091	0.148064	0.242061	0.331026	0.413851	0.489365	0.556568	0.61492	0.664539	0.706179	0.740993	0.770244	0.795081	0.816444	0.835054	0.851446	0.864459	0.874232	0.882884	0.89058	0.897459	0.903638	0.909217	0.914278	0.91889	0.92311	0.926987	0.93056	0.933865	0.93693	0.939781	0.94244	0.944925	0.947254	0.94944	0.951496	0.953434	0.955264	0.956994	0.958632	0.960186	0.961661	0.963065	0.964401	0.965675	0.96689	0.968052	0.969162	0.970226
1.77889	0.0500453	0.148197	0.242326	0.331466	0.414509	0.490281	0.557772	0.616425	0.66634	0.708252	0.743307	0.772767	0.797783	0.819301	0.838046	0.854558	0.867753	0.87761	0.886336	0.894098	0.901036	0.907268	0.912895	0.917999	0.92265	0.926906	0.930816	0.934419	0.937752	0.940843	0.943719	0.9464	0.948906	0.951255	0.953459	0.955533	0.957488	0.959333	0.961077	0.962729	0.964296	0.965784	0.9672	0.968547	0.969832	0.971058	0.972229	0.973349	0.974421
1.79899	0.0500808	0.148327	0.242587	0.331897	0.415154	0.49118	0.558955	0.617906	0.668113	0.710295	0.74559	0.775257	0.800451	0.822122	0.841001	0.857633	0.871009	0.88095	0.889749	0.897576	0.904572	0.910857	0.916531	0.921678	0.926369	0.930661	0.934603	0.938237	0.941597	0.944714	0.947614	0.950318	0.952845	0.955213	0.957436	0.959527	0.961498	0.963358	0.965117	0.966783	0.968363	0.969864	0.971291	0.97265	0.973945	0.975181	0.976362	0.977491	0.978572
1.81909	0.0501156	0.148454	0.242842	0.332321	0.415787	0.492063	0.560118	0.619363	0.669859	0.712309	0.747841	0.777713	0.803084	0.824908	0.843921	0.86067	0.874226	0.88425	0.893122	0.901015	0.908069	0.914406	0.920127	0.925317	0.930047	0.934374	0.938349	0.942013	0.945401	0.948544	0.951467	0.954193	0.956742	0.959129	0.96137	0.963479	0.965466	0.967341	0.969115	0.970795	0.972388	0.973901	0.975339	0.976709	0.978015	0.979261	0.980452	0.981591	0.982681
1.83919	0.0501496	0.148579	0.243092	0.332736	0.416409	0.492931	0.561262	0.620798	0.671579	0.714294	0.750062	0.780138	0.805685	0.82766	0.846805	0.863672	0.877405	0.887513	0.896458	0.904415	0.911527	0.917916	0.923684	0.928917	0.933685	0.938047	0.942055	0.945748	0.949164	0.952333	0.95528	0.958028	0.960597	0.963004	0.965264	0.967389	0.969392	0.971283	0.973071	0.974764	0.97637	0.977896	0.979346	0.980727	0.982043	0.9833	0.9845	0.985648	0.986747
1.85929	0.050183	0.148701	0.243338	0.333143	0.417019	0.493783	0.562387	0.622209	0.673273	0.716251	0.752252	0.782532	0.808252	0.830379	0.849655	0.866638	0.880548	0.89074	0.899756	0.907778	0.914948	0.921388	0.927203	0.932477	0.937284	0.941682	0.945721	0.949445	0.952888	0.956082	0.959053	0.961823	0.964413	0.966839	0.969116	0.971259	0.973278	0.975184	0.976986	0.978693	0.980312	0.98185	0.983312	0.984703	0.986031	0.987297	0.988507	0.989664	0.990772
1.87939	0.0502157	0.148821	0.243578	0.333543	0.417619	0.494621	0.563493	0.623599	0.674943	0.718181	0.754414	0.784894	0.810788	0.833064	0.852471	0.869569	0.883656	0.89393	0.903018	0.911103	0.918331	0.924823	0.930683	0.936	0.940845	0.945277	0.949349	0.953102	0.956573	0.959792	0.962786	0.965578	0.968189	0.970634	0.972929	0.975089	0.977124	0.979045	0.980862	0.982582	0.984214	0.985763	0.987237	0.98864	0.989977	0.991254	0.992473	0.993639	0.994756
1.89949	0.0502478	0.148939	0.243815	0.333935	0.418207	0.495444	0.564581	0.624967	0.676588	0.720084	0.756548	0.787227	0.813293	0.835718	0.855254	0.872467	0.886727	0.897085	0.906244	0.914393	0.921677	0.92822	0.934127	0.939486	0.944368	0.948836	0.952939	0.956722	0.960219	0.963464	0.966481	0.969295	0.971926	0.97439	0.976704	0.97888	0.980931	0.982867	0.984698	0.986432	0.988076	0.989637	0.991123	0.992537	0.993884	0.995171	0.9964	0.997575	0.9987
1.9196	0.0502792	0.149054	0.244046	0.33432	0.418785	0.496253	0.565651	0.626314	0.678209	0.721961	0.758653	0.789531	0.815768	0.838339	0.858005	0.875332	0.889764	0.900205	0.909435	0.917647	0.924988	0.931582	0.937535	0.942935	0.947855	0.952357	0.956492	0.960304	0.963828	0.967098	0.970139	0.972974	0.975625	0.978109	0.98044	0.982633	0.9847	0.986651	0.988495	0.990243	0.9919	0.993473	0.99497	0.996394	0.997753	0.999049	1.00029	1.00147	1.0026
1.9397	0.0503101	0.149167	0.244274	0.334698	0.419353	0.497048	0.566704	0.627641	0.679807	0.723813	0.760731	0.791806	0.818212	0.84093	0.860724	0.878164	0.892809	0.903291	0.912591	0.920867	0.928264	0.934908	0.940906	0.946348	0.951306	0.955842	0.960009	0.963849	0.967401	0.970695	0.973759	0.976617	0.979287	0.98179	0.984139	0.986348	0.988431	0.990397	0.992255	0.994016	0.995685	0.997271	0.998779	1.00021	1.00158	1.00289	1.00414	1.00533	1.00647
1.9598	0.0503403	0.149278	0.244497	0.33507	0.419911	0.49783	0.56774	0.628947	0.681382	0.725639	0.762782	0.794053	0.820627	0.843491	0.863412	0.880964	0.895784	0.906343	0.915714	0.924052	0.931505	0.9382	0.944243	0.949726	0.954721	0.959292	0.96349	0.967359	0.970938	0.974257	0.977344	0.980222	0.982913	0.985434	0.987801	0.990027	0.992125	0.994106	0.995978	0.997752	0.999434	1.00103	1.00255	1.004	1.00538	1.00669	1.00795	1.00915	1.0103
1.9799	0.05037	0.149387	0.244716	0.335434	0.420459	0.498599	0.56876	0.630234	0.682935	0.727442	0.764807	0.796272	0.823014	0.846022	0.866069	0.883733	0.898726	0.909364	0.918804	0.927204	0.934713	0.941457	0.947546	0.953069	0.958102	0.962707	0.966936	0.970834	0.974439	0.977783	0.980892	0.983792	0.986503	0.989043	0.991427	0.99367	0.995783	0.997779	0.999665	1.00145	1.00315	1.00476	1.00629	1.00774	1.00913	1.01046	1.01172	1.01293	1.01409
2	0.0503991	0.149494	0.244931	0.335792	0.420998	0.499356	0.569764	0.631502	0.684466	0.72922	0.766807	0.798464	0.825372	0.848525	0.868697	0.886472	0.901637	0.912352	0.921862	0.930323	0.937887	0.944682	0.950815	0.956379	0.961449	0.966087	0.970348	0.974274	0.977906	0.981274	0.984406	0.987328	0.990058	0.992616	0.995018	0.997277	0.999406	1.00142	1.00332	1.00512	1.00682	1.00844	1.00998	1.01145	1.01285	1.01419	1.01546	1.01668	1.01785
[truncated: 51 more columns]
